1 **The Practice of Gender and Protection Mainstreaming**  
2 **in Health Response in Humanitarian Crisis - A Case**  
3 **Study from the Refugee Camps in Cox's Bazar,**  
4 **Bangladesh**

5

6

7 Charls Erik Halder<sup>1,2\*</sup>

8

9 1. Global Public Health Specialist, Chattogram, Bangladesh

10 2. Humanitarian and Conflict Response Institute, University of Manchester, UK

11

12

13 \* Corresponding author

14 Email: [cehalder@outlook.com](mailto:cehalder@outlook.com)

15

## 16 **Abstract:**

17 **Background:** The health system is required to be safe, equitable, and accessible to all ages,  
18 gender, and vulnerable groups, including older persons and persons with disability, and address  
19 their specific needs and concerns. However, limited evidence is available on the effectiveness  
20 and practicality of gender and protection mainstreaming interventions in health response in  
21 humanitarian crises.

22 **Objective:** The overall objective of the research was to explore practices, gaps, and challenges  
23 and generate recommendations regarding gender and protection mainstreaming in health  
24 response to the Rohingya refugee crisis in Cox's Bazar, Bangladesh.

25 **Methodology:** The research employed a qualitative case study design to explore the practice of  
26 gender and protection mainstreaming in health response in Cox's Bazar. Data collection methods  
27 include an extensive literature review and in-depth interviews with professionals.

28 **Result:** The study found a range of good practices on gender and protection mainstreaming in  
29 health response, e.g. placement of a gender action plan, monitoring system for gender and  
30 disability inclusion, emergency preparedness and response system, availability of sex-segregated  
31 toilets and waiting spaces, availability of gender-based violence service and engagement of  
32 female community health workers. The study also revealed some best practices which have the  
33 potential to scale up, e.g. psycho-social spaces at health facilities for children, palliative care for  
34 terminally ill patients, integrated medical and protection services, and facilitation of community  
35 health facility support groups. Critical gaps were found in the areas of women's leadership,  
36 coordination, capacity building, targeted interventions for vulnerable groups, infrastructural  
37 adaptation and consultation with the community on their concerns.

38 **Conclusion:** We urge policymakers, sector coordinators, health program management,  
39 healthcare workers, and global stakeholders to address the gaps and challenges, learn and scale  
40 up the best practices, and take action to implement the study's recommendations to maximise  
41 gender and protection mainstreaming in health response.

## 42 **Background:**

43 In humanitarian crises, health response aims to reduce avoidable mortality, morbidity and  
44 disability that could result from the crisis and to restore access to preventive and curative  
45 healthcare (1). The humanitarian principle requires that any humanitarian aid, including health  
46 assistance, should be provided based on need and without discrimination (2), meaning that  
47 everyone should have meaningful access, safety and dignity in humanitarian health service (3).  
48 Therefore, the health system requires it to be safe, equitable and accessible to all ages, gender  
49 and vulnerable groups, including children, older persons, men, women, gender-diverse  
50 populations (GDP) and persons with disability, and address their specific needs and concerns. In  
51 a word, gender and protection should be mainstreamed with health response in humanitarian  
52 settings, which means that the health response should prioritise safety and dignity, avoid causing  
53 harm, ensure meaningful access of all people to health service without any discrimination,  
54 promote accountability to the affected population and assist people in claiming their rights to  
55 health (3).

56 Humanitarian crises disproportionately affect women, girls and children and put them at a  
57 heightened risk of gender-based violence (GBV) due to breaches of security and protection  
58 measures (4). In some crises, more than 70% of women have faced GBV (4). Patriarchy and  
59 discriminatory social norms increase the vulnerability of women to disease, disability and injuries  
60 and impede their access to healthcare (5,6). Globally, approximately 15% of the population has  
61 some form of disability, and around 13% of the people are aged over 60 (7). Persons with  
62 disability and older persons often face discrimination based on their age and disability. In many  
63 cases, the inclusion of persons with disability and older people remains under-prioritised, and  
64 health partners may lack the capacity to improve their access and respond to their unique needs  
65 (7,8). People with other vulnerabilities, e.g., people living with HIV (PLHIV) or sexually transmitted  
66 infections (STI), may be stigmatised in society, affecting their dignified access to health services.

67 This qualitative case study was implemented in the context of the Rohingya refugee crisis in Cox's  
68 Bazar, Bangladesh, one of the fastest-growing and largest refugee crises in the world. An  
69 estimated 925,380 Rohingya refugees are residing in 33 extremely congested camps in Cox's

70 Bazar following their mass displacement from Myanmar in 2017, ignited by systematic  
71 discrimination and targeted violence (9). The refugee crisis resulted in an increased demand for  
72 health services, which is being further exacerbated by frequent outbreaks of infectious diseases,  
73 like diphtheria, measles, cholera, COVID-19, and dengue (10–12). To meet the demand currently,  
74 80 health partners are providing primary and secondary healthcare services in the camps through  
75 93 health posts, 43 Primary Health Care centres (PHCs), Field Hospitals and a network of 1300  
76 community healthcare workers (CHW) (13). The gender and protection concerns mentioned  
77 above also mirror in this crisis. Rohingya women and girls have the added risk and challenges of  
78 insecurity, violence, restricted mobility or speaking up and lack of influence on decision-making  
79 (14). An estimated 12% of the population has some form of disability and faces multiple barriers,  
80 discriminations and limitations to access care and services, and older female persons with  
81 disabilities were disproportionately affected by the gaps and challenges (15).

82 To ensure the mainstreaming of gender and protection in health response in humanitarian crises,  
83 many guidelines and tools are made available for the humanitarian partners both globally and in  
84 specific local contexts, especially in Cox’s Bazar. Global protection cluster (16), as well as  
85 protection clusters of different humanitarian crisis settings, including Pakistan (17) and Somalia  
86 (18) as well as UNICEF (19) produced guidelines on protection mainstreaming in humanitarian  
87 health response. The guidelines highlighted a wide range of measures, including safety and  
88 dignity, gender and disability-inclusive infrastructure, accessibility of health service to all,  
89 including persons with disability and the elderly, prevention of and response to gender-based  
90 violence, staffing representative of gender, ethnic and economic differences, provision of  
91 reproductive and obstetric health services, provision of private breastfeeding space, women’s  
92 empowerment and leadership, provision of community outreach activities for women and girls,  
93 and interventions for culturally appropriate psycho-social support. Considering the inclusion of  
94 persons with disability and older people is not adequately prioritised in humanitarian health  
95 response, IASC guidelines on the inclusion of persons with disability in humanitarian action (20)  
96 and the Humanitarian inclusion standards for older people and persons with disability (7) clearly  
97 outlined the actions and standards for the inclusion of older people and persons with disability,  
98 specific to health response. Locally, in the context of the Rohingya refugee crisis in Cox’s Bazar,

99 several guidelines are also available for gender and protection mainstreaming in humanitarian  
100 health response.

101 However, as per the author's literature review, no study was found that comprehensively  
102 examined the practical aspects of overall protection and gender mainstreaming in humanitarian  
103 health response except some isolated studies on women's leadership, sexual and reproductive  
104 health services, prevention of and response to sexual and gender-based violence (SGBV) and  
105 inclusion of persons with disability and older persons. For instance, although enhancement of  
106 gender-inclusive leadership and engagement of women frontline workers, women groups and  
107 networks in decision-making can contribute to achieving better health outcomes for the affected  
108 population in humanitarian crises, women are found extremely underrepresented in  
109 humanitarian leadership (21,22). In some fragile and post-conflict contexts, women are primarily  
110 employed in nursing and midwifery positions; however, they are grossly under-represented in  
111 the management (23). Female staff in humanitarian contexts often face challenges in balancing  
112 their career and cultural expectations of household activities (24).

113 Strong leadership and effective resource mobilisation, engaging with communities through  
114 outreach initiatives and tiered community reproductive health services, deployment of female  
115 community health workers, psychosocial interventions to address emotional and mental health  
116 needs and capacity building of healthcare workers, including those at lower levels are among the  
117 best practices in sexual and reproductive health (SRH) interventions evidenced in different  
118 humanitarian settings (25–30). Some barriers in this field identified were lack of training, weak  
119 communication, inadequate staffing, limited attention to local organisation and insufficient focus  
120 on clinical management of rape services (25).

121 Despite the availability of general guidance on the inclusion of persons with disability and older  
122 people in humanitarian response, there are significant research gaps in evidence regarding the  
123 effectiveness of inclusion efforts, use of disability and age-disaggregated data over 60 years, cost and  
124 benefits of inclusion strategies, and the intersection of disability and older age (8,31).

125 In summary, both globally and in the local context of Cox's Bazar, adequate guidelines and tools  
126 are available for the humanitarian partners for protection and gender-inclusive health

127 interventions in humanitarian response. However, except in the area of SRH services, minimal  
128 studies have been available that have generated evidence on the uptake, practicality, and  
129 effectiveness of those interventions. The research gap is more prominent for the Rohingya  
130 refugee crisis in Cox's Bazar. This study was undertaken to fill up the research gap with the overall  
131 objective of exploring practices, gaps, and challenges and generating recommendations  
132 concerning gender and protection mainstreaming in humanitarian health response to Cox's Bazar  
133 Rohingya refugee crises.

134

## 135 **Research Methodology**

### 136 **Study design:**

137 This was a case study with a qualitative design aimed to explore the practices, gaps, and  
138 challenges and generate recommendations concerning gender and protection mainstreaming in  
139 humanitarian health response. Given that the protection and gender mainstreaming is a complex  
140 phenomenon which involves awareness, actions, behaviour and capacity of a broad spectrum of  
141 stakeholders, including policymakers, humanitarian workers and the community, a qualitative  
142 approach was chosen to gain an understanding of what interventions in gender and protection  
143 mainstreaming are being taken, how practical or effective they are, what is going well and what  
144 is not, and how we can further improve the system. Further, a case study as a qualitative study  
145 type is well suited to get extensive and in-depth explanations of a complex social phenomenon  
146 (32). Since no study is available that gives a comprehensive picture of the practicality of gender  
147 and protection mainstreaming in health response in the humanitarian context, a case study of  
148 the refugee context in Cox's Bazar was chosen to gain a comprehensive understanding of this  
149 complex phenomenon.

150

### 151 **Research philosophy:**

152 This qualitative study design is underpinned by a critical realism epistemological position. The  
153 research investigated the experiences of health and protection sector experts to understand the  
154 complexity of gender and protection mainstreaming practice in humanitarian health response,  
155 which was triangulated with existing literature/reports.

156

## 157 **Research Setting:**

158 The study was implemented in Cox's Bazar district of Bangladesh. This district is inhabited by  
159 around 1 million Rohingya refugees living in 33 congested camps. This is one of the most  
160 significant refugee crises in the world and has a cluster-like humanitarian response involving  
161 multiple sectors and working groups, including health, protection, WASH, site management and  
162 communication with the community (CWC) (33). More than 60 humanitarian organisations,  
163 including a mix of local, national and international organisations, are responding to this crisis  
164 under the umbrella of Intersector Coordination Group (ISCG) (34). Thus, a case study on gender  
165 and protection mainstreaming in this environment can represent comparable humanitarian  
166 situations worldwide, and the results can help enhance gender and protection mainstreaming in  
167 health in current and future crises globally.

168

## 169 **Data collection methods and processes:**

170 Two qualitative methods were deployed for this study – a) secondary data collection through an  
171 extensive literature review and b) primary data collection through in-depth interviews of 12 key  
172 informants.

173

174 **a) Literature review:** In addition to a generic literature review during the design phase of  
175 this study, an extensive literature review from the local context was done as part of data  
176 collection. This included a review of existing policies, strategies, guidelines and reports  
177 that focus or reflect on gender and protection mainstreaming in health response. The  
178 literature review aimed: a) to provide analysis of existing policy/strategic  
179 recommendations for gender/protection mainstreaming, b) to provide themes of

180 discussions for in-depth interviews, and c) to enable triangulation and comparison of the  
181 findings of in-depth interviews in contrast to the existing recommendations/reports

182

183 **b) In-depth interviews with key informants:** Key informant interviews were conducted  
184 with experts from the health and protection sectors. *Sampling:* Purposive and snowball  
185 sampling techniques were employed to select the participants who have specialisation  
186 and expertise in the areas of a) gender, child protection and general protection; b)  
187 emergency health response; c) operation and management of primary health care; and  
188 experience with the Rohingya refugee crisis. The total sample size for the qualitative  
189 interviews was 12. Eight participants were initially selected purposively from the health  
190 and protection sector partners, and the remaining four were selected through the  
191 snowball technique. The purposive sample size is usually determined based on theoretical  
192 saturation (35); however, as data review and analysis were done in parallel with data  
193 collection, it was found that the total sample size of 12 was enough for this study.

194

195 **Data collection instrument:**

196 An interviewer-administered semi-structured questionnaire was used for data collection from  
197 the participants. The questionnaire had open-ended questions focusing on the experience of the  
198 participants in gender and protection mainstreaming in health response, particularly a) existing  
199 practices, b) practicability, effectiveness and efficiency of the practices, c) available guidelines  
200 and tools, d) competency, relevance and practicality of the tools, e) gaps and challenges, f) best  
201 practices, and g) recommendations for further improvement. The tool was piloted among 2  
202 participants. During interviews, participants were directed by the themes highlighted in the  
203 literature review while leaving questions open-ended and retaining their natural social world.

204

205 **Data collection process:**

206 One-to-one in-person or online interviews were conducted. Using the semi-structured  
207 questionnaire (**S1. Interview Guidance**), each participant was asked about their experience,  
208 insight and opinions on existing and proposed practices of gender and protection mainstreaming



209 in health response. The interviews lasted for about 1 - 1.5 hours and were arranged in a preferred  
210 private setting of the participant (e.g. office room of the participant, residence) in Cox's Bazar  
211 city or using Microsoft Team. Interviews were conducted in English and Bangla as per the  
212 convenience of the participant. In in-person interviews, data were scripted into a Microsoft Word  
213 document. In the case of online interviews, the recording was done by the Microsoft team, and  
214 after transcription writing, the recordings were permanently deleted.

215

## 216 **Data analysis:**

217 Recommendations from the existing policies and strategies were thematically organised. As  
218 mentioned, interviews were transcribed verbatim in a Microsoft Word document. Thematic  
219 analysis was done for the data collected through in-depth interviews since it is the appropriate  
220 method for the analysis of experiences, thoughts and behaviours (36). As guided by Braun and  
221 Clarke (37), data were manually analysed in six steps: a) familiarisation with all the data through  
222 reading and re-reading, b) coding key features into the entire data set, c) collating the codes into  
223 potential themes; d) reviewing the themes against the codes and dataset and generating a  
224 thematic map; e) defining and naming the themes, and f) writing the narrative of analysis. During  
225 the analysis process, themes were generated inductively from the interview data as well as  
226 deduced from the literature review. Validation of the data was an integral part of the data  
227 analysis process. Items with low relevance to the research questions/themes were eliminated,  
228 and items having similar concepts were merged.

229

## 230 **Ethical consideration and data confidentiality:**

231 The research project was reviewed and approved by the School of Arts, Languages and Cultures  
232 Ethics Committee at the University of Manchester (Ref: 2022-13668-24736). The study was  
233 designed in such a way that it eliminated any risk of physical or mental discomfort, harm, or  
234 damage from its process or publication and placed the highest priority on protecting the rights  
235 and welfare of research participants as well as vulnerable refugees in the target settings. The  
236 research is planned based on morality to address the evidence gaps on gender and protection

237 mainstreaming in humanitarian health response and generate recommendations for  
238 improvement in this field in local and global humanitarian contexts. No commercial or financial  
239 relationships could be taken as a potential conflict of interest.

240

241 The study did not collect any personally identifiable information (except for the consent form) or  
242 any sensitive or confidential information. The study did not involve participants from vulnerable  
243 or dependent groups, such as Rohingya refugees, considering their protection concerns. Before  
244 the interview with the professionals, the participants were provided with clear information on  
245 the background, objectives, and study procedure. Written informed consent was taken from each  
246 participant. Participants were allowed to skip any question or withdraw themselves from the  
247 interview at any time. All data were stored in the university-provided P-drive, and data analysis  
248 was done on an encrypted computer. In the case of online interviews, the recordings were  
249 permanently deleted from the storage once transcription writing was completed. Identifying  
250 information was stored securely and separately from the study data. The information was kept  
251 in a password-protected file.

252

## 253 **Results:**

254 This research explored current strategies, guidelines and practices of gender and protection  
255 mainstreaming and the practicality of different interventions in healthcare settings, including the  
256 best practices, gaps and challenges. In this section, firstly, the findings from the review of local  
257 policies, strategies and guidelines are presented, and the gender and protection mainstreaming  
258 interventions recommended by relevant strategies and guidelines are summarised into a  
259 thematic framework. Later, we presented the findings from the in-depth interviews as well as  
260 different local reports under each theme deduced from the framework as well as new themes  
261 derived inductively from the interviews.

262

## 263 **Policy, strategies and guidelines:**

264 A significant number of strategies, guidelines and resources are available in Cox's Bazar to guide  
265 the humanitarian partners on gender and protection mainstreaming in health response. Gender  
266 and protection mainstreaming is strategised in the health sector strategic plan through its  
267 commitment to prevent and respond to GBV, strengthen mainstreaming of accountability to  
268 affected population (AAP) in all phases of health response, promote accessibility and inclusion of  
269 persons with disability and prevent sexual exploitation and abuse (PSEA)(13).

270 The health sector gender action plan (GAP) outlined targeted and gender mainstreaming  
271 interventions in line with the overall objectives of the sector (38). The plan focused on generating  
272 sex, age, and disability disaggregated data and reports, monitoring the provision of GBV and  
273 gender-responsive health services, establishing gender-responsive health facilities (e.g. sex-  
274 segregated rooms, female staff), engaging women and community leaders on gender-responsive  
275 health operation, capacity building of staff and volunteers on gender, GBV, protection and PSEA  
276 and updating the partners on needs, challenges and responses concerning gender-responsive  
277 health service. The plan provides specific indicators in these areas to monitor the interventions  
278 (38).

279  
280 The health and protection sectors jointly formulated a tip sheet for protection mainstreaming in  
281 health response for the Rohingya refugee response in line with the Global Protection  
282 Mainstreaming Health Tip Sheet (39). To prioritise safety, dignity and avoiding harm, the  
283 document guided safe location and routes of health facilities, infrastructural adaptation,  
284 prioritisation of vulnerable groups for care, general awareness raising on PSEA, respectful and  
285 inclusive cultural and religious practices, confidentiality and privacy, and deployment of female  
286 staff. It provided tips to ensure meaningful access to health services by all, inclusive of persons  
287 with disability, older persons and mental health conditions, suggested having staff representative  
288 of gender and ethnic differences, and outlined action points for health staff to respond to specific  
289 needs of victims of human rights violence including GBV. The guideline also outlined actions to  
290 ensure accountability and participation of vulnerable individuals through coordination with local  
291 authorities and civil society organisations working with older persons and persons with disability,  
292 facilitation of health committees with representation from all layers of society, capacity building

293 of staff on communication with children and establishment of suggestions and complaint  
294 mechanism (39).

295 The health sector developed a framework for ensuring AAP in line with Global Health Cluster  
296 Operational Guidance on AAP to mainstream accountability of health partners to patients,  
297 beneficiaries and their communities (40). The framework focused on the engagement of all layers  
298 of people in all phases of the health program, enhancing awareness of patient rights,  
299 communication with the community and establishment of feedback and response mechanism  
300 (40).

301 The Health Sector and Child Protection subsector jointly developed guidance for child protection  
302 and health care for children in health facilities during the COVID-19 outbreak, addressing their  
303 vulnerabilities (41). This is detailed under the child protection section later in this article.

304 Application of Gender with Ager Marker (GAM) (42) is a prerequisite for submitting a project  
305 proposal by the health partners to the Joint Response Plan (JRP), i.e., the humanitarian appeal,  
306 to assess how their projects contribute to enhancing opportunities for different gender, age, and  
307 disability groups through meaningful and effective engagement. The health sector partners are  
308 trained by the Gender in Humanitarian Action (GiHA) Working Group to effectively apply the tool  
309 in their applications.

310

311 The framework below summarises the actions for gender and protection mainstreaming in health  
312 response recommended by local policies, strategies, and guidelines in Cox's Bazar.

313

314 **Table 1: Actions for gender and protection mainstreaming in Cox's Bazar recommended by**  
315 **policies and strategies\*:**

316

| Themes                       | Recommended interventions                                                                                                             |
|------------------------------|---------------------------------------------------------------------------------------------------------------------------------------|
| Coordination and partnership | Develop, implement, and monitor the health sector gender action plan; discuss gaps/challenges in health sector coordination meetings. |
|                              | Develop minimum standards to guide partners on disability inclusion in healthcare.                                                    |

It is made available under a [CC-BY 4.0 International license](https://creativecommons.org/licenses/by/4.0/) .

|                                                          |                                                                                                                                                                                              |
|----------------------------------------------------------|----------------------------------------------------------------------------------------------------------------------------------------------------------------------------------------------|
|                                                          | Coordinate with local authorities and Civil Society Organizations specialised in working with persons with disability to include them in the assistance program.                             |
|                                                          | Coordinate with the Age and Disabilities Working Group (ADWG) to map out NGOs offering services to vulnerable groups for training and referral of health staff.                              |
|                                                          | Distribute advocacy/joint communication products on gender-responsive programming and GBV.                                                                                                   |
|                                                          | Update Health Sector partners and key health networks on gender-responsive health developments.                                                                                              |
|                                                          | Sensitize JRP partners for adherence to PSEA principles                                                                                                                                      |
|                                                          | Collaborate with the protection sector, GBV and child protection subsectors, ADWG and Gender in Humanitarian Action working group                                                            |
| <b>Staffing, leadership and capacity building</b>        | Staff should be representative of gender and ethnic differences; employ an adequate number of female health staff members;                                                                   |
|                                                          | Staff capacity building on gender, child and protection mainstreaming, including linkage to psychosocial support and legal support                                                           |
|                                                          | Staff should speak in Rohingya language or be aware of common local vocabulary appropriate for the work.                                                                                     |
| <b>Safety and security:</b>                              | Safe and accessible location of health facilities and routes                                                                                                                                 |
|                                                          | Consider seasonal environmental risks for accessing health facilities - consider transport arrangements.                                                                                     |
|                                                          | Place security measures for health facilities and routes (e.g. lights, security)                                                                                                             |
|                                                          | Safe placement of medical supplies to avoid harm to children                                                                                                                                 |
|                                                          | Placement of security guards, if necessary, for safety and protection                                                                                                                        |
|                                                          | Safe disposal of healthcare wastes                                                                                                                                                           |
|                                                          | Place crowd control and infection prevention and control measures                                                                                                                            |
| <b>Infrastructural adaptation, WASH and patient flow</b> | Separate waiting areas for male and female                                                                                                                                                   |
|                                                          | Infrastructural adaptation to health facilities and latrines for older persons and persons with disabilities (e.g. smooth paths, ramps)                                                      |
|                                                          | Prioritisation of older persons with disability, unaccompanied children and pregnant women in the queue                                                                                      |
|                                                          | Dignified waiting space for people with specific vulnerabilities (e.g. persons with disability, pregnant women, breastfeeding mothers, children, PLHIV and gender-diverse populations (GDP)) |
|                                                          | Separate male and female toilets in the health facility with appropriate labelling                                                                                                           |

It is made available under a [CC-BY 4.0 International license](https://creativecommons.org/licenses/by/4.0/) .

|                                                           |                                                                                                                                                 |
|-----------------------------------------------------------|-------------------------------------------------------------------------------------------------------------------------------------------------|
|                                                           | Child-friendly latrine design                                                                                                                   |
|                                                           | Separate shade for children and lactating mothers; breastfeeding corner                                                                         |
|                                                           | Menstrual hygiene management kit available at health facility with training to staff                                                            |
|                                                           | Separate examination room with proper privacy                                                                                                   |
|                                                           | Sex-segregated spaces and rooms at health facilities                                                                                            |
| <b>Child protection</b>                                   | Signing of code of conduct by staff for child safeguarding                                                                                      |
|                                                           | Child-friendly waiting space; Space for children to play if they wait for caregivers.                                                           |
|                                                           | Child-friendly communication by health staff, including guards                                                                                  |
|                                                           | Ensure access to health services by children.                                                                                                   |
|                                                           | Train staff on child protection, communication with children, and referral mechanisms for child protection cases.                               |
|                                                           | Explanation to children/caregivers before physical contact with children                                                                        |
|                                                           | Contact with child protection actors for engagement with children without a caregiver.                                                          |
| <b>Targeted interventions</b>                             | Special arrangements for individuals who cannot access health services, e.g. mobile health teams or home-based care.                            |
|                                                           | Establish a referral system for victims of human rights violations to specialised services, including MHPSS.                                    |
|                                                           | Special service provision for consultation/treatment for persons with hearing, speech, language, psychosocial and/or intellectual disabilities. |
| <b>Prevention of and response to GBV (including PSEA)</b> | General awareness raising on (PSEA) rules and code of conduct                                                                                   |
|                                                           | Train staff on GBV/harmful traditional practices, response and referral pathways and psychosocial support                                       |
|                                                           | Health facilities to collaborate with GBV and general protection partners for referral of GBV survivors                                         |
|                                                           | Facilitate meetings among health, protection, GBV, and child protection actors on the referral pathways.                                        |
|                                                           | Consider room design, type of furnishings and equipment for examination/consultation of GBV survivors.                                          |
|                                                           | Place guidelines and mechanisms for monitoring and reporting abuse or exploitation                                                              |
|                                                           | Train staff on PSEA, including security guards and volunteers                                                                                   |
|                                                           | Present PSEA messages in a child-friendly and gender-sensitive manner                                                                           |
|                                                           | Aware staff of do-not harm by recalling memories during psychosocial treatment                                                                  |

|                                                                                       |                                                                                                                                                                                                        |
|---------------------------------------------------------------------------------------|--------------------------------------------------------------------------------------------------------------------------------------------------------------------------------------------------------|
|                                                                                       | Safety audit to identify current and newer risk                                                                                                                                                        |
|                                                                                       | Survivor-centred approach for all patients                                                                                                                                                             |
|                                                                                       | Report and share protection concerns of individuals to the protection sector, including GBV and child protection subsector                                                                             |
| <b>Communication with the community and accountability to the affected population</b> | Design and implement health activities with community engagement in all phases of the project lifecycle                                                                                                |
|                                                                                       | Functional context appropriate (safe, accessible, trusted) feedback and complaint mechanism in an accessible place with multiple options and proper privacy                                            |
|                                                                                       | Feedback mechanism flexible for children, illiterate people, persons with disability and older persons                                                                                                 |
|                                                                                       | Consultation and meaningful engagement with all layers of the community (e.g. women, men, girls, boys, children, elderly, GDP and persons with disability) to identify and respond to the health needs |
|                                                                                       | Ensure consistent participation of all layers of the community and integrate their feedback during assessment, planning, implementation, monitoring, and evaluation.                                   |
|                                                                                       | Ensure health committees and workers are representatives of all layers                                                                                                                                 |
|                                                                                       | Training health committees on child protection, GBV, disability and diversity                                                                                                                          |
|                                                                                       | Engage women, community and religious leaders in gender-responsive health operations.                                                                                                                  |
|                                                                                       | Wide range of IEC materials (e.g. pictorials, audio, video, infographics) etc. to reach out to persons with non-mobility-related disabilities                                                          |
|                                                                                       | Support cultural, religious and social activities and practices that can impact safeguarding health.                                                                                                   |
|                                                                                       | Ensure that information on waiting times, processes, and procedures at a facility is shared in the local language.                                                                                     |
|                                                                                       | Let beneficiaries know their rights to healthcare and how to access it.                                                                                                                                |
|                                                                                       | Consider local solutions/coping strategies to address the vulnerabilities (e.g. pooled funds for taxi services)                                                                                        |
| <b>Information management</b>                                                         | Set project indicators and reports disaggregated by age, sex, gender, location and specific groups (e.g. persons with disability and ethnic minorities)                                                |
|                                                                                       | Monitor and review the proportionate distribution of health services.                                                                                                                                  |
|                                                                                       | Confidential handling of information – collection, processing, storing or communicating                                                                                                                |
|                                                                                       | Confidentiality and privacy during consultation, counselling or personal information sharing                                                                                                           |

|  |                                              |
|--|----------------------------------------------|
|  | Informed consent for sharing any information |
|--|----------------------------------------------|

317

318 \*Synthesized from a) Health Sector Strategic Plan (2023 – 2024) (13); b) Health Sector Gender  
319 Action Plan (38); c) Health Sector Programme - Tips for Protection Mainstreaming (39); d)  
320 Accountability to Affected Populations (AAP) Framework (40); and Child Protection & Health Care  
321 for Children in Health Facilities during COVID-19 Cox’s Bazar (41)

322

## 323 **Coordination and partnership**

324 The health sector implements several initiatives for gender mainstreaming in line with its gender  
325 action plan, which includes sharing the Gender Action Plan with the partners, collecting and  
326 disseminating gender-disaggregated reports and supportive supervision of health facilities for  
327 their adherence to recommended gender-responsive measures. Linked to the Gender Action Plan  
328 and other social inclusion actions, the health sector also performs quarterly monitoring of the  
329 actions, e.g., the presence of sex-segregated toilets, measures for access for persons with  
330 disability, availability of GBV services, presence of community complaints and feedback  
331 mechanisms. Although this monitoring system contributes a lot to the partners' adherence to  
332 the recommended actions, some of the indicators in the system only focus on physical  
333 presence/availability rather than quality and/or functionality. As expressed by one participant,  
334 *“...for instance, the monitoring system finds out whether a health facility has a disability-friendly  
335 toilet, but the system cannot track whether the toilet is actually being utilised by a person with a  
336 disability”*.

337

338 For the Rohingya refugee crisis, there is a Gender in Humanitarian Action Working Group (GiHA  
339 WG) that provides support to all sectors and humanitarian organisations for effective integration  
340 of gender in their actions through coordination, technical advice, guidance, capacity building,  
341 advocacy, assessment, and information sharing. (43). The health sector collaborates with GiHA  
342 WG for the strategic review of gender mainstreaming in health response and capacity building of  
343 the partners in the aspect of gender integration (e.g., Gender with Age Marker) and  
344 commemoration of relevant days (e.g., International Women’s Day 2022).



345  
346 There is also close collaboration between the health sector (and its relevant working groups, e.g.,  
347 SRH working group) and the GBV subsector of the protection sector for establishing and  
348 implementing the GBV referral pathways at the refugee camps, including capacity building of the  
349 partners on compassionate GBV referrals. However, as per some participants, limited partnership  
350 and networking efforts are observed in terms of protection of other vulnerable individuals,  
351 especially persons with disability and older people. Only a few agencies, e.g., Humanity &  
352 Inclusion and Help Age International, in Cox's Bazar, have dedicated health programs for persons  
353 with disability and older people.

354  
355 There is also a gap noted on the unavailability of a contextualised framework for the inclusion of  
356 persons with disability and older persons, as expressed by an emergency health expert –

357  
358 *“...there are some guidelines available globally for age and disability inclusion. For this context, it*  
359 *is required to have guidance for the partners on what minimum practical measures should be*  
360 *placed at the health facility as well as other health programs, for example, immunisation for*  
361 *improving access of persons with disability and older people”.*

362

## 363 **Staffing and leadership**

364 The guidelines recommend employing female health staff with skills and experience in working  
365 with women and children and ensuring that the health facilities have both male and female  
366 doctors and nurses. (39). It has been found in the health sector quarterly monitoring report that  
367 all health facilities (100%, n=136) have a minimum of a female medical professional in the  
368 functioning hours of the facility (44). Participants expressed that having female staff in the health  
369 facility allows women patients/clients to access health care from the facility comfortably; they  
370 feel more comfortable speaking and taking part in physical examinations. According to the  
371 number of consultations in a medical facility, as several participants mentioned, women use the  
372 facilities more frequently than males in the Cox's Bazar context.

373

374

375 In Bangladesh, nurse and midwife positions are traditionally seen as occupations for women.  
376 Therefore, naturally, most nurses and all midwives in the health facilities in the camps are  
377 women. However, females are still grossly lagging in other health professions, e.g., doctors,  
378 medical assistants, and laboratory technologists. This is a fact for leadership positions as well.  
379 Women have less representation in leading positions, like health facility managers or  
380 coordinators. During the study, it was found that only two of the twelve camp health focal  
381 persons and field coordinators who coordinate camp-based health sector responses were  
382 female. While women have more significant leadership in the SRH Working Group, they have less  
383 representation in other working groups and technical committees. During the study, most of the  
384 working groups, e.g., Strategic Advisory Group, MHPSS working group, Emergency Preparedness  
385 and Response Technical Committee, Mobile Medical Team Working Group, and Community  
386 Health Working Group, were led by men. It can be related to the lack of family and social  
387 acceptance for women to work in humanitarian crises and the fact that there is no particular  
388 prioritisation system in place for women to be in leadership roles. As expressed by a participant,  
389 *“Although it is written in the job advertisements that women are encouraged to apply, often there*  
390 *is no mechanism in place for prioritising us (women) in different key roles.”* One gender expert  
391 expressed that *“...a reason (for lack of women leadership) can be their (women’s) families and*  
392 *societies do not allow them or feel comfortable for them to work in a crisis setting, like Cox’s*  
393 *Bazar”*.

394  
395 It is recommended that staff should be trained on different aspects of gender and protection  
396 mainstreaming, including gender diversity, gender-based violence, CMR, child protection,  
397 disability and diversity, and PSEA mainstreaming (39). Many of these trainings, e.g., PSEA and  
398 gender mainstreaming, are mandatory for all staff working in the UN agencies or international  
399 organisations. As a public health expert expressed,

400  
401 *“gender mainstreaming, PSEA, and code of conduct training are either mandatory or routinely*  
402 *organised for UN agencies and international organisations. However, this practice should be*  
403 *standardised for all humanitarian agencies, especially for local NGOs. The training methods*  
404 *should be adapted based on the different levels of capacity and skill of the staff or healthcare*

405 *workers. For instance, a webinar could be helpful for office staff, but more practical and simplified*  
406 *training is required for ambulance drivers and cleaners, who are often third-party contracted”.*  
407

408 Participants also opined that there are only a few training initiatives are undertaken for  
409 healthcare workers or health program managers/officers on age and disability inclusion, child  
410 protection, and protection of other vulnerable groups (e.g., gender-diverse populations, patients  
411 with HIV or Hepatitis C).

412

## 413 **Safety and Security**

414 While most facilities are located in an accessible location, due to the area's hilly terrain, there are  
415 a few facilities located on hilltops or at a location inaccessible by ambulances. This affects the  
416 accessibility of vulnerable individuals, especially pregnant women, persons with disability, older  
417 persons, and critically ill patients. The health sector and its partners conducted a rationalisation  
418 exercise to identify such facilities and recommend them for relocation to a safer and easily  
419 accessible location (45). Some partners, after receiving recommendations from either the  
420 community or the sector, relocated their facility to a safer and more accessible location.

421

422 Apart from this, heavy monsoons resulting in flash floods sometimes impede the accessibility of  
423 the general community, especially vulnerable individuals, to health facilities. To mitigate the risk,  
424 the health sector established a mechanism for early notification of the closure of any facility due  
425 to monsoon or weather-related events. In such cases, a Mobile Medical Team can be activated  
426 to provide care to the affected community from an alternate site. However, in reality, the floods  
427 affect not only the accessibility of the community but also the healthcare workers travelling to  
428 the camps. During monsoon season, if the flood impedes the accessibility of healthcare workers  
429 to the camp, the health facility may be closed, resulting in the unavailability of health services for  
430 the affected population.

431

432 As recommended in the protection mainstreaming guideline (39), most facilities have placed  
433 security measures, e.g., lights, security guards, etc., to avoid any incidence of violence and to

434 promote safer access to the facility by the beneficiaries, especially those with vulnerabilities. One  
435 of the challenges expressed by some participants is that the power supply is not always consistent  
436 in the camp setting. Most facilities rely on solar systems or electric generators. Rainy weather  
437 and mechanical disturbances of the solar system/generator may affect the solar/generator  
438 function.

439  
440 Usually, medical equipment and supplies are kept in a safe location away from children to avoid  
441 any possible harm to them. However, participants expressed that the pharmacist and logistic  
442 staff should be further sensitised on this issue.

443  
444 Further, participants stated that a good infection prevention and control (IPC) system has been  
445 placed in most health facilities in Cox's Bazar. World Health Organization provides training and  
446 technical assistance to the facilities for implementing IPC measures to prevent hospital-acquired  
447 infection among patients, healthcare workers, and the community. Healthcare waste  
448 management is still a critical concern for health facilities. However, partners are now more  
449 sensitised and trying to adopt environmentally friendly measures for biomedical waste  
450 management to prevent any harm or exposure to the patients and the community.

451

## 452 **Infrastructural adaptation, WASH, and patient flow:**

453  
454 In line with the protection and gender mainstreaming guidelines (39), participants opined that  
455 most health facilities have physically separated and labelled toilets for males and females. This is  
456 also evident in the health sector quarterly monitoring report suggesting that 90% of the health  
457 facilities in the camps had sex-segregated latrines for patients (44). However, 30% of the facilities  
458 did not have sex-segregated latrines for staff (44). Participants also suggested that some agencies  
459 have the practice of placing a menstrual hygiene kit in the female toilets for patients and staff.  
460 However, this practice is not widely used by the partners and is not adequately monitored.

461

462 Usually, most health facilities have segregation in waiting spaces for males and females, but due  
463 to high patient turnover and space limitations, it is often difficult to have separate consultation  
464 rooms for males and females, especially in small health posts. Participants opined that such a  
465 separate arrangement is needed in this setting to increase women's access to healthcare services.  
466 Prioritisation of older people, persons with disability, unaccompanied children, and pregnant  
467 women is recommended (39), however, this is not standardised for all facilities. This is partly  
468 caused by the fact that–

469

470 *“triage system is not standardised for all partners. Some use the ETAT protocol of WHO, some use*  
471 *the interagency integrated triage tool (IITT), and some do not even have any protocol. Standard*  
472 *protocols prioritise patients based on acuity or emergency; there is no mention of prioritisation*  
473 *on the grounds of older age, disability, or pregnancy. However, this is anyway happening in some*  
474 *facilities from the humanitarian ground...”* expressed by a triage/IPC expert.

475

476 One of the recommendations for protection mainstreaming in health response is infrastructural  
477 adaptations to the health facilities and restrooms, e.g. ramps and railings, handle grip, etc., for  
478 older persons and persons with disability (38,39). According to the health sector quarterly  
479 monitoring report (44), less than 50% of the health facilities had a disability-friendly latrine. Only  
480 39% of the health posts and 58% of the PHCs had the provision of ramps. Below half of the PHCs  
481 and only one-fourth of the health posts had the provision of side rails. Other measures placed by  
482 the health facilities for persons with disability included the provision of wheelchairs (74% health  
483 posts, 97% PHCs), stretchers (58% health posts and 86% PHCs), and Crutch (11% health posts,  
484 23% PHCs) (44). Therefore, a large number of health facilities are not using appropriate  
485 infrastructural and other measures to increase the accessibility of persons with disability and  
486 older persons. Some experts expressed that although some facilities placed some measures for  
487 the inclusion of persons with disability and older persons, in many cases, these are not  
488 functionalised. For instance, one of the experts shared that one health facility labelled a toilet as  
489 disability-friendly, but in practice, they were using it as a storeroom. Factors behind poor  
490 compliance of the health facilities for disability-friendly infrastructural adaptations include lack  
491 of sensitisation of the management and healthcare workers and lack of availability of  
492 infrastructural guidance.

493

494 While it is essential to ensure the labelling of the toilets is understandable to all literacy levels,  
495 universal icons/symbols are usually used as labels, which may not be comprehensible to the  
496 general community in the camps. Moreover, the designs of the toilets (e.g. high commode) and  
497 locking system may not be familiar to the beneficiaries. Therefore, it is recommended to consult  
498 with the community, including persons with disability and older people, on their preferences  
499 (39)However, it is opined that such a consultation process merely happens in this context. One  
500 of the good practices mentioned is using Burmese or Rohingyaish (a Rohingya language written  
501 in the English alphabet) instead of English or Bangla for easy understanding by the refugee  
502 community.

503

504 One of the challenges mentioned was that toilets in many of the facilities are not friendly to  
505 children with or without disabilities. Although the protection mainstreaming guideline  
506 recommends that latrine design account for children, this is barely taken into account during  
507 latrine installation. This could be caused by the program staff or engineers' lack of awareness of  
508 this issue. Similarly, most facilities do not provide separate space for children and lactating  
509 women, as is recommended; however, the majority of primary healthcare facilities maintain a  
510 breastfeeding corner.

511

512 Water, Sanitation and Hygiene Health Facility Improvement Tool (WASH FIT) outlined some  
513 indicators to monitor for gender and disability inclusion in WASH in health facilities, e.g., male-  
514 female segregated toilets for patients and staff, provision of menstrual hygiene management kits  
515 at least in one toilet and provision of disability-friendly toilet (46). With WHO's initiative, a  
516 training program was cascaded among healthcare workers, facility managers, and engineers in  
517 2019 on this. Experts opined that this initiative significantly improved gender and disability  
518 inclusion in WASH at health facilities. The participants recommended continuing such training  
519 and placing appropriate follow-up and monitoring systems.

520

521 **Child protection**

522 For the protection of children, the health facilities maintain close coordination with child  
523 protection actors in the camp. It is recommended that the waiting space should be child-friendly  
524 and there should be space for children to play (39). Primary healthcare specialists who  
525 participated in this study expressed that this is often not possible to implement in a camp setting  
526 due to space limitations and overcrowding. However, many of the facilities have mental health  
527 and psychosocial units which organise entertainment and social events for children and  
528 adolescents. A few agencies have some space for children to play or art. Participants expressed  
529 that there is a critical gap that training or learning opportunities for healthcare workers are not  
530 sufficient for child protection and communication with children. This results in a lack of initiative  
531 from the healthcare workers to create a child-friendly environment in the health facilities.

532

### 533 **Targeted interventions toward vulnerable groups:**

534 There are only a few agencies in the camps that are implementing targeted interventions for  
535 persons with disability, older age and critically ill patients. Some agencies (e.g. YPSA, Helpage  
536 International) provide health screening, healthcare and referral support to geriatric patients  
537 through home-based care and age-friendly spaces. (47,48). However, geriatric services are not  
538 mainstreamed with the provision of the primary healthcare provided by the PHCs and health  
539 posts. Few agencies, e.g. Humanity and Inclusion (HI), are providing specialised support to  
540 persons with disability with physiotherapy and assisted devices. Participants opined that such  
541 support to persons with disability is inadequate in comparison to the need. This can be linked to  
542 the fact that 56% of persons with disability reported not having received any assisted device in a  
543 year, as revealed by an assessment conducted by the age and disability working group (15). The  
544 survey also reported that female older persons with disabilities were disproportionately affected;  
545 67% of female older persons with disabilities had not received any assistive devices (15). Further,  
546 participants of this study stated that there are no standardised guidelines or referral pathways  
547 available for the treatment, support and care of persons with disability and older people.

548

549 The referral system in Cox's Bazar, from the refugee camps to tertiary hospitals, mostly focuses  
550 on life-saving assistance to acutely ill patients. Patients with chronic conditions requiring long-

551 term and cost-intensive treatment (e.g. chronic hepatitis, end-stage kidney diseases, advanced  
552 cancers) often do not get referral support for definitive treatment. Palliative care appears to be  
553 a new concept among health actors, and currently, only one organisation, namely IOM, provides  
554 home- and facility-based palliative care in the camp.

555

556 *“There could be many patients in the camps who are at their terminal stage of disease. They may*  
557 *not need comprehensive treatment support. But at least they have the right to lead a peaceful*  
558 *life, physically and mentally, until the end of their life, meaning they will need palliation of their*  
559 *pain and suffering. However, palliative care is not mainstreamed with the primary healthcare*  
560 *service provision. As far as I know, IOM is the only agency that provides home-based and facility-*  
561 *based palliative care in a few camps. Such service needs further scale up”.*

562

563 Although SRH and MHPSS are integrated into primary healthcare, very few interventions are  
564 taken by partners to improve the physical, mental, and psychosocial health of gender-diverse  
565 populations (GDP). It is believed that there remains a low level of awareness and a high degree  
566 of stigmatisation toward GDP.

567

## 568 **Prevention of and response to gender-based violence:**

569 Prevention of and response to Gender-based violence (GBV) is a multisectoral approach. Almost  
570 in all refugee camps, a comprehensive GBV referral pathway is established, mentioning the  
571 contact details of health (clinical management), mental health, case management (adult and  
572 children), legal aid and safe shelter service providers from the health and protection sectors (49).  
573 Listed service providers are trained in providing relevant GBV services.

574

575 The Minimum Package of Essential Health Services for Primary Healthcare Facilities in FDMN  
576 Camps stipulates that primary healthcare facilities (24/7 clinics with inpatient) in refugee camps  
577 must provide first-line support, clinical care for sexual violence and intimate partner violence (i.e.  
578 Clinical Management of Rape - CMR) and facilitate safe referrals to other service providers (50).  
579 While CMR is not a requirement for health posts (daytime outpatient posts), they should provide



580 survivor-centred care, first-line support, and safe referral support. Ninety-three per cent of PHCs  
581 (n = 43) had the provision of GBV services, according to the quarterly monitoring report of the  
582 health sector (44). More than 90% of these facilities offered emergency contraceptive pills and a  
583 CMR referral pathway, and approximately 70% provided post-exposure prophylaxis (PEP) and  
584 menstrual regulation kits (44). Only 45 per cent of health posts (n = 93) were found to have GBV  
585 health services, and only nearly half of these facilities had a CMR referral pathway (44). The  
586 survey also revealed that three out of thirty-four refugee camps lacked a single facility that  
587 provides GBV post-exposure prophylaxis (PEP).

588

589 Research participants expressed one of the key challenges in CMR or GBV services at the facilities  
590 that there is a lack of awareness of the healthcare workers on the reporting arrangement; for  
591 example, many of the healthcare workers have the misperception that all cases of rape or sexual  
592 violence should be reported to the police. However, with repeated training and advocacy, this  
593 misperception is being significantly reduced among healthcare workers. Frequent staff turnover  
594 is another challenge requiring organising training for the newly joined staff. This also affects the  
595 availability of trainers in the pool for facilitating relevant training (e.g. CMR) since the lead  
596 agencies organise the training of trainers with the aim of creating a pool of trainers for cascading  
597 the training among healthcare workers at health facilities.

598

599 Some agencies are finding better ways to integrate health and protection support for GBV  
600 survivors. For example, some agencies have GBV case workers within the health facility, which  
601 can provide integrated health and protection services. Another best practice noted by an agency  
602 is having healthcare workers (e.g. midwives) in the women and girl safe spaces (WGSS) and  
603 secure and health learning spaces for providing health care and education services in integration  
604 with GBV prevention and case management services of the protection sector. Several agencies  
605 engage their CHWs to raise awareness of the community on GBV and its referral pathways,  
606 enhancing access of GBV survivors to care and support.

607

## 608 **Communication with community and accountability to** 609 **affected population**

610 Engagement of community including all layers of the community, including women, men, girls,  
611 boys, children, elderly, GDP and persons with disability throughout the project life cycle is an  
612 essential requirement for accountability to the affected population as well as to appeal to Joint  
613 Response Plan (39,40). Participants expressed that community engagement in health program  
614 design is often neglected. There is no mechanism in place to track whether actual consultation  
615 with the community was made during the project design. Some participants also emphasised that  
616 there is limited effort to engage with women's groups, and most community groups are  
617 dominated by male community leaders (e.g., Majhi/Imams).

618 The establishment of a community feedback mechanism is another area of focus for AAP (40).  
619 Participants expressed that most facilities have some form of community feedback mechanism  
620 in place, e.g. feedback box, hotline number, box and coin method. Participants expressed that  
621 these mechanisms are not often utilised because either participants may be unaware of the  
622 system or the system may not be flexible to all, e.g. illiterate, children, persons with disability. In  
623 many cases, it is also unclear how or whether these systems can influence the improvement or  
624 adjustment of the quality of service. Participants mentioned a good practice that some health  
625 facilities are facilitating community health facility support groups with representation from  
626 different gender and ages, persons with disability and community leaders. This group owns the  
627 health facility and provides feedback through periodic meetings with the facility managers. The  
628 input allows the management to take necessary measures to improve its service.

629 There is a network of 1300 community health workers (CHW) across the refugee camps who  
630 perform risk communication and community engagement activities. Most of them are recruited  
631 from the local community (i.e. Rohingya), and the majority of them are women. Being women,  
632 they have more accessibility to the households and can discuss things with female family  
633 members. CHWs facilitate health promotion sessions, perform active case searches and referrals,  
634 follow-up immunisation, and raise awareness of gender and various health issues in the

635 community through regular household visits and community group meetings. People from  
636 different gender, age groups and background participate in these sessions.

637 Several working groups and agencies are active in this setting for the development and  
638 dissemination of information, education and communication (IEC) materials, including flip charts,  
639 posters, audio clips and videos in local languages. Some participants suggested that the  
640 community should be more engaged in developing risk communication strategies and materials.  
641 Concerns of different gender, age groups and persons with disability are often not considered in  
642 many communication products and strategies. As one participant questioned -

643 *“We have developed frequently asked question aids for dengue risk communication. CHWs use*  
644 *this job aid to share the information during their household visits or group sessions. But have we*  
645 *considered any culturally familiar methods, e.g. street drama or folk songs? Have we considered*  
646 *how we will reach out to those messages who have difficulty in speech and hearing? How about*  
647 *older people who often cannot join during the sessions?”*

648

649

## 650 **Information Management**

651 One of the core requirements for gender analysis of health is generating and reporting cases of  
652 COVID-19 and OPD services with sex, age and disability disaggregation (38). Multiple reporting  
653 systems are in place in Cox’s Bazar for disease surveillance and health information management.  
654 While disaggregation of male-female data is happening in all reporting systems, some key  
655 reporting systems have limitations for age and disability disaggregation. Most of the systems do  
656 not have segregation options for gender-diverse populations. WHO Early Warning, Alert and  
657 Response System (EWARS) is a surveillance tool designed for early detection and warning of  
658 infectious disease outbreaks. The weekly indicator-based surveillance platform of the system  
659 collects and reports data disaggregated by sex (male and female) and age group over-5 and  
660 under-5 years. District Health Information System -2 (DHIS-2) also have a similar arrangement for  
661 daily morbidity reporting. Therefore, both systems fail to give analysis regarding the accessibility,  
662 morbidity and concerns of different age groups, e.g. older persons, adolescents, and persons with  
663 disability. However, EWARS and GoData (another surveillance tool of WHO) have case report  
664 forms for some ongoing/threatening outbreak conditions, e.g. COVID-19, Diphtheria, Dengue,

665 acute watery diarrhoea, Acute Flaccid Paralysis, which collect detailed case-by-case information,  
666 including exact age of the individuals, allowing proper segregation of data by age group. Yet,  
667 disability disaggregation is not included in these systems. Only a few agencies use the  
668 Washington Group Short Set on Functioning (WG-SS) tool as part of their internal health  
669 information system to document the proportion of individuals treated at their health facilities  
670 who have a disability. However, experts have opined that this tool cannot be used for children  
671 below two years of age.

672

### 673 **Emergency preparedness and response:**

674 Cox's Bazar is a disaster-prone district, and the Rohingya refugees and adjacent host communities  
675 are highly susceptible to the direct and indirect health impacts of cyclone and monsoon-related  
676 heavy rains and landslides, such as drowning, mass casualty, and outbreaks of disease (51).  
677 Mobile medical teams play a crucial role in such preparedness and response. The MMTs are  
678 required to have a midwife to ensure the integration of SRH services and the representation of  
679 female personnel. The MMT team composition includes a protection officer who leads the  
680 identification of people requiring protection assistance, such as separated families,  
681 unaccompanied children, survivors of GBV, persons with disability, and older people, and  
682 facilitates the referral of the identified individuals to protection service providers (such as  
683 protection focal persons, Protection Emergency Response Unit – PERU) (52). Partners have  
684 various options for engaging a protection officer in the team, including a) having a dedicated  
685 protection staff from the agency, b) having a seconded protection sector staff within the MMT,  
686 and c) training MHPSS staff or other team members to provide protection services. Protection  
687 officers are trained to provide survivor-centre support to GBV survivors, including psychological  
688 first aid (PFA) and safe referrals; to provide child-friendly support to unaccompanied and  
689 separated children (UASC) or children who have experienced any form of violence, and to  
690 facilitate referrals of vulnerable individuals in need of specialised protection assistance.

691

692 The Mobile Medical Team Working Group of the health sector conducts regular training on  
693 protection mainstreaming for MMT health staff and protection officers. This is another example

694 of a best practice for protection mainstreaming in emergency health response. A functional link  
695 is also established between Mobile Medical Teams and Protection Emergency Response Units for  
696 referring survivors of gender-based violence to each other for clinical management and  
697 protection assistance, respectively. However, experts in emergency health response believe that  
698 the central coordination between the health and protection sectors should be strengthened to  
699 standardise the mainstreaming of protection focal persons across all MMTs.

700

## 701 **COVID-19 outbreak response:**

702 The COVID-19 outbreak within the camps and the pandemic as a whole had a significant impact  
703 on gender and vulnerabilities. Humanitarian partners have taken substantial steps to  
704 mainstream gender and protection into COVID-19 preparedness and response. One of the  
705 indicators set in the health sector GAP is “Percentage of reports of FDMN/Rohingya refugee and  
706 host community samples tested with results disaggregated by age and sex” (38). In the case  
707 management system, partners had the provision of separate male, female and child wards with  
708 proper privacy.

709 One challenge the healthcare workers and the general community encountered was that many  
710 personal protective equipment (PPE) were not gender and child-inclusive. For instance, the  
711 masks provided to the community or health facility were not designed for children. Outbreak  
712 response experts informed that the gowns and scrubs were not designed according to the body  
713 structure of women. However, there were also some best practices mentioned for gender  
714 mainstreaming; for instance, one of the partners produced and distributed “medical hijab’ and  
715 culturally friendly scrubs to women.

716 One of the misconceptions persists within the community that if the women wear *nikab* (a thin  
717 piece of garment that cover face of Muslim women), they do not need to wear a mask assuming  
718 *nikab* and mask give same level of protection. As one of the experts expressed, “...the perception  
719 that *nikab* can protect women from COVID-19 increased their exposure to the virus and as a result  
720 proportion of COVID-19 among women gradually increased”.

721 The health sector and child protection subsector developed comprehensive guidance for the care  
722 of children in health facilities during COVID-19 (41). From each Severe Acute Respiratory Illness  
723 Isolation and Treatment Center (SARI ITC), the child protection actors trained some healthcare  
724 workers on psychological first aid (PFA), psychosocial support, and communication with children.  
725 These trained healthcare workers acted as “child carers” to provide care to unaccompanied  
726 children while in the centre. The SARI ITCs were linked with child protection actors to address a  
727 variety of child protection concerns, including a) how to mitigate if a child leaves the centre with  
728 a non-caregiver if the child is distressed seeing critically ill patients, b) who will accompany a child  
729 with COVID-19 at a SARI ITC if the formerly healthy caregiver contract COVID-19, c) what  
730 alternative options are available for healthy children of a COVID-19 infected caregiver, d) how  
731 the child will be supported if their caregiver dies at the ITC, e) what support can be provided to  
732 the children abandoned at the ITC or f) how to mitigate the risk of children/adolescents running  
733 away from the health facility. However, in practice, many partners faced challenges in admitting  
734 a COVID-19-infected caregiver who might have multiple dependent young children.

735 Participants in the study view the COVID-19 vaccination campaign for Rohingya refugees in Cox's  
736 Bazar as one of the best examples of gender and protection integration in a health response. The  
737 vaccination campaign began with individuals over 55 years old and expanded to include all adults  
738 (>18 years) and adolescents over time (12 – 17 years). During this study, preparations were made  
739 to vaccinate children aged 5 to 11. Through the network of CHWs and volunteers in  
740 communication for development, extensive risk communication efforts were made to mobilise  
741 all target populations, including men, women, persons with disability, and the elderly. Some  
742 health agencies collaborated with site management and protection actors to identify individuals  
743 with mobility issues and provide porter assistance (e.g. persons with disability, extreme age,  
744 critically ill patients).

745

746

747 **Discussion:**

748 The research investigated gender and protection mainstreaming practices, gaps, and challenges  
749 and generated recommendations for their implementation in humanitarian health response. To  
750 the author's knowledge, this is the first study ever conducted in a humanitarian setting on the  
751 practice of gender and protection mainstreaming in health response. The discussion is organised  
752 into eleven broad themes, the same as the result section.

### 753 **Strategy, partnership and collaboration:**

754 Health and protection sectors in Cox's Bazar developed a significant number of gender and  
755 protection mainstreaming plans and guidelines. The requirement for the application of Gender  
756 with Age Marker (GAM) for gender and protection mainstreaming in making JRP appeal is one of  
757 the best practices in this setting. Another key strength identified in this setting is the extensive  
758 collaboration of the health sector with the protection sector, child and GBV subsectors and GiHA.  
759 However, although a lot of focus has been given to enhancing the inclusion of women in staffing  
760 and access to service, there is no significant strategy proposed to enhance women's leadership  
761 in health program management and coordination. This gap is noted not only for this particular  
762 context in Cox's Bazar but also found in other gender and protection mainstreaming  
763 plans/strategies (17,18). Further, although the health sector strategic plan recognises the need  
764 for a minimum standard of disability inclusion for health response, unlike gender mainstreaming,  
765 the coordination mechanism is less focused on addressing other vulnerabilities, especially  
766 persons with disability and older age individuals. The sector has a system in place to monitor the  
767 adherence of the partners to different recommended measures, however, the system focuses  
768 mainly on quantitative achievement rather than functionality and quality. The system can be  
769 further strengthened to address this concern by adding qualitative indicators and methods into  
770 the M&E system (53).

771

### 772 **Staffing and capacity building**

773 One of the key strengths of this context is the significant representation of women in the health  
774 workforce, as evidenced by the fact that all health facilities have at least one female medical

775 professional staff member. The study revealed, however, that the distribution of female  
776 employees is not proportional across all positions and that women are underrepresented in  
777 leadership and coordination roles, particularly in program management, camp coordination, and  
778 leading the working groups. The findings of this study are similar to studies in some other  
779 contexts. For instance, Patel et al. identified that women are underrepresented in humanitarian  
780 leadership (21), and Witter et al. found that women were largely employed in nursing and  
781 midwifery positions and under-represented in management (23). This study also found that such  
782 underrepresentation might be caused by a lack of family and social acceptance for women to  
783 work in humanitarian settings and the fact that there is no special prioritisation system in place  
784 for women to be in leadership roles. This is similar to the finding of RedR in Jordan that female  
785 staff have to balance their career and cultural expectations of household activities (24).

786 The study also found that although training is organised on different aspects of gender and  
787 protection mainstreaming, there is a lack of focus on training on child protection, communication  
788 with children and inclusion of various vulnerable groups, e.g. older persons, persons with  
789 disability and people, and people living with HIV. Also, the training opportunities are not equal  
790 for all agencies, and sometimes training methods are not adapted according to the capacity level  
791 of the staff.

792

## 793 **Safety and security:**

794 A strength of this response is that the health sector and partners conduct a rationalisation  
795 exercise that can recommend partners to establish or relocate their facilities to a safer and more  
796 accessible location. This appears to be an effective strategy given that some partners have  
797 relocated their facilities to safer places following the rationalisation's recommendation. Even  
798 though natural disasters such as monsoons and cyclones pose critical threats to health  
799 operations, the health partners implement mitigating measures, such as the operation of mobile  
800 medical teams, to provide lifesaving health services. The installation of general security  
801 measures, such as lights, security guards, etc., by most facilities is also recognised as an effective  
802 safety measure.



803

804 The study found that inconsistent power supply to the health facilities in the refugee camps is a  
805 critical challenge, which can increase the risk of exposure to gender-based violence or impede  
806 timely access to emergency health services. A sustainable emergency solution should be planned  
807 at the sector and policy level, taking into account different best stories in a similar context  
808 (54,55).

809

810 The placement of infection and control measures in most health facilities by the partners is a  
811 strength of this system to prevent hospital-acquired infection among staff, patients and the  
812 community. However, further science-based research should be undertaken to better  
813 understand the effectiveness of the protocols in the facilities (56). The study found that Cox's  
814 Bazar is yet to have a comprehensive biomedical waste management system which is linked to  
815 the protection risk of the community and healthcare workers due to the infectious and hazardous  
816 nature of biomedical waste. This concern is not specific to Cox's Bazar but generalised for other  
817 emergency and low-resource settings, exacerbated during the COVID-19 pandemic (57,58). The  
818 health partners should coordinate and share responsibilities for a harmonised waste  
819 management system exploring innovative solutions (57).

820

## 821 **Infrastructure, WASH and patient flow:**

822 This study found a mixed type of adherence of partners to the recommendations on  
823 infrastructure, WASH and patient flow in relation to gender and protection mainstreaming. While  
824 most of the facilities have sex-segregated toilets, only half of the facilities have a disability-  
825 friendly toilet, and consideration of access to children is merely considered in the toilet facilities.  
826 A gross number of health facilities are not adhering to recommended infrastructural adaptations  
827 to the health facilities for older persons and persons with disabilities. Also, concern was raised  
828 that having the physical presence of these segregated toilets or adapted structures does not  
829 guarantee their appropriate utilisation by the target groups. These concerns could be linked to a  
830 lack of guidance on infrastructure design, a lack of sensitisation of facility designers on gender  
831 and protection mainstreaming, as well as a lack of orientation of the healthcare workers on the

832 need for such segregation and arrangement. Having separate consultation rooms for males and  
833 females is often not practical in many facilities, especially in small facilities with limited human  
834 resources.

835  
836 Although the Water, Sanitation, and Hygiene Health Facility Improvement Tool (WASH FIT)  
837 outlines some indicators to monitor gender and disability inclusion in WASH in health facilities,  
838 comprehensive guidance should be developed for the partners to address the above concerns of  
839 gender and protection mainstreaming in health facility infrastructure, WASH, and patient flow  
840 systems.

841  
842 Prioritisation of older people, persons with disability, unaccompanied children and pregnant  
843 women in the patient queue is not standardised and not practised universally in all facilities. This  
844 is linked to a lack of standardised triage tools for all health facilities and the fact that standard  
845 triage tools used globally (e.g. ETAT, IITT) prioritise patients based on acuity, not based on social  
846 vulnerability. The study also found that vulnerable groups with protection concerns (e.g. women,  
847 pregnant and lactating mothers, older persons, persons with disability, and people living with  
848 HIV) are often not consulted in practice to learn their concerns, needs and cultures, which could  
849 be reflected in the health facility design and infrastructural adaptation.

850

## 851 **Child protection:**

852 The research identified a critical gap in the capacity building of healthcare workers on  
853 communication with children and child protection. Strengthening the child protection system is  
854 crucial to preventing and responding to abuse and exploitation (59) and strengthening the health  
855 workforce can contribute to strengthening the child protection system. The research also  
856 identified some best practices, e.g., organising social/entertainment events for children and  
857 having space for children to play/art by a few agencies, which can be scaled up for better  
858 psychosocial well-being of the children.

859

## 860 **Targeted interventions toward vulnerable groups:**

861 The research found that only a few agencies in the camps are engaged in rehabilitative, palliative  
862 and home-based care for persons with disability and older persons. Also, there are no  
863 standardised guidelines or referral pathways made available for the treatment, support and care  
864 of persons with disability and geriatric illness. This can be related to the fact that rehabilitative  
865 and palliative care are not integrated with the primary healthcare provision in Cox's Bazar (50)  
866 and there is limited data available on the barriers and concerns of persons with disability and  
867 older people not only in Cox's Bazar but globally in other contexts (8,31). The study also found a  
868 lack of targeted initiatives for the gender-diverse population (GDP), which could contribute to  
869 systemic inequalities and hinder the effectiveness of broader efforts aimed at promoting  
870 inclusivity and equity. Therefore, evidence-based targeted initiatives are warranted to address  
871 the specific barriers and opportunities of people with different vulnerabilities.

872

## 873 **Prevention and Response to Gender Based Violence (GBV)**

874 The study found that a significant effort has been made to prevent and respond to GBV in the  
875 Rohingya refugee camps, as evidenced by a comprehensive GBV referral pathway in place for all  
876 camps, and over 90% of the PHCs have the provision of GBV services. However, there are some  
877 gaps, such as only half of the health posts having a CMR referral pathway and a few camps not  
878 having the facility to provide GBV PEP services. The study also found some key challenges, like  
879 misconceptions among staff regarding reporting GBV cases and frequent staff turnover affecting  
880 the availability of trainers for facilitating relevant training. One of the best practices identified by  
881 the research is that some agencies provide GBV medical (CMR) and protection (case  
882 management) services in the same facility, enhancing the timeliness, promptness, effectiveness,  
883 and confidentiality of the response. Another innovation is that an agency has healthcare workers  
884 (e.g., midwives) in the women and girls safe spaces (WGSS) and safe and health learning spaces  
885 to provide healthcare and education services integrated with GBV prevention and case  
886 management services. With the partners' efforts and a strong monitoring and coordination  
887 system, GBV service is well-mainstreamed in health response. This is significant progress in

888 comparison to the preliminary situation in refugee influx, when a study found that the public  
889 health and aid agencies gave little attention to the survivors of GBV in Rohingya refugee camps  
890 (60). The progress can be considered as a strength in this response, comparing the findings with  
891 other similar settings like the Uganda crisis, where the GBV response faced several challenges,  
892 including the inadequate provision of screening, health staff, drugs and treatment psycho-social  
893 counselling (61,62).

894

## 895 **Communication with the community and accountability to the** 896 **affected population**

897 Our study found that although it is in principle to engage different layers of the community,  
898 including women, men, girls, boys, children, elderly, GDP and persons with disability throughout  
899 the project life cycle, this is often neglected in practice. Partners have various methods of  
900 collecting feedback from the community, but concern was raised on whether such feedback is  
901 taken into consideration to influence the facility's quality improvement. However, one of the best  
902 practices mentioned is having a community health facility support group with representation  
903 from different layers of society, which can have direct dialogue with the facility management and  
904 influence system change and improvement. The research also found that a network of 1300  
905 community health workers, mostly female, play a critical role in community engagement through  
906 household visits and community sessions. These findings are similar to another research study  
907 by the author on COVID-19 risk communication and community engagement, which concluded  
908 that the selection of CHWs from the local community, deployment of female CHWs, and speaking  
909 in the local dialect can significantly contribute to community engagement (63). Engagement of  
910 female CHWs was also considered best practice in other contexts (27,64). However, the risk  
911 communication and community engagement strategy should be more inclusive of gender, age,  
912 and disability, and specific strategies and materials should be designed to reach out to different  
913 groups. WHO community engagement guidelines also emphasise local understanding and  
914 engagement consistent with the language, culture, and context (65).

915

## 916 **Information Management**

917 Although one of the core requirements for gender and protection mainstreaming is to have sex,  
918 age and disability disaggregated data, some key reporting systems in Cox's Bazar, e.g. EWARS,  
919 DHIS-2 only desegregate data based on sex (male-female) and below five years and over five  
920 years with the exception for case report forms for ongoing outbreaks having details of gender  
921 and age. The systems hardly have options for disaggregation of data for persons with disability  
922 and GDP. The finding of this study echoes the result of a study by Robinson et al (2020) (8), which  
923 found limited evidence on data collection and identification of persons with disability and older  
924 persons in humanitarian response. Disaggregation of data to the extent possible enables to  
925 identify whether assistance is being distributed or accessed impartially or disproportionately (2).  
926 Therefore, the reporting systems should be upgraded to have proper disaggregation based on  
927 age (inclusive of adolescent and older age), gender (not just sex) and disability. The study found  
928 a good practice of using the Washington Group Short Set on Functioning (WG-SS) by some  
929 agencies to document the proportion of people with disability, though it has the drawback that  
930 it is not child-inclusive and does not capture the barriers of persons with disability. Therefore,  
931 WG-SS should be further scaled up at all facilities and other relevant tools, e.g. DTM MSLA for  
932 Disability Inclusion, can be used to identify barriers faced by persons with disability (66).  
933 Washington Group/UNICEF child functioning module can be used for surveying children with  
934 disability (67).

935

## 936 **Emergency preparedness and response:**

937 The study found that the emergency preparedness and response system in Cox's Bazar has a  
938 strong collaboration between health and protection partners. During emergencies, a protection  
939 officer remains as a part of the emergency mobile medical teams to deal with the protection  
940 concern. Mobile medical teams also coordinate with Protection Emergency Response Units  
941 (PERU) to integrate the management of protection concerns (e.g., GBV, UASC). Additionally, the  
942 mobile medical teams ensure that midwives and MHPSS staff in the teams provide SRH, mental  
943 health, and psychosocial support. Our study echoes the finding of An After Action Review

944 following a massive fire incident in 2021 that a protection focal person from the protection sector  
945 in MMT is a best practice for protection mainstreaming in emergency health response for early  
946 identification, initial support and referral of individuals with protection concern (68).

947

948

## 949 **COVID-19 outbreak response:**

950 The COVID-19 response in Cox's Bazar made some remarkable arrangements for gender and  
951 protection mainstreaming, which includes age and sex-disaggregated data systems and separate  
952 male, female and child wards. There was strong collaboration between health and child  
953 protection partners for admission of children with COVID-19 or caring for children with a COVID-  
954 19-positive caregiver. The Child Protection subsector also trained healthcare workers as "child  
955 carers" to provide for unaccompanied children while in the centre. One challenge was that the  
956 PPE designed for the healthcare workers and the general community were not gender inclusive.  
957 This is not just a local concern in Cox's Bazar but a general concern that happened globally (69).  
958 However, partners demonstrated some innovative solutions of having "medical hijab" and  
959 culturally friendly scrubs for women, which can be marked as a best practice and replicated in  
960 other outbreaks. The study also found that there was confusion or misconception among women  
961 regarding the *nikab*, whether it is equivalent to a mask. Such confusion was also found in other  
962 settings in the world (70). However, this confusion/misconception was not addressed in the risk  
963 communication and community engagement strategy, which increases the exposure risk of  
964 women to COVID-19. The COVID-19 vaccination campaign for the Rohingya refugees is  
965 considered another best example of gender and protection mainstreaming where all gender and  
966 age groups are gradually enrolled. A best practice of collaboration among health, site  
967 management and protection actors was found to identify and provide porter support to  
968 individuals having mobility issues (e.g. persons with disability, extreme age, and critically ill  
969 patients).

970

## 971 **Limitation of the study:**

972 This research could be more informative if more data collection methods were employed, e.g.,  
973 actual observation of gender and mainstreaming processes in the refugee camps, focus group  
974 discussion, or interviews with vulnerable groups. However, due to the limitations of time and  
975 resources and consideration of protection concerns, the research methods were limited to the  
976 literature review and in-depth interviews of professionals.

977  
978 Sexual and reproductive health concerns were intentionally excluded from the study, considering  
979 the availability of extensive literature in this field.

980

## 981 **Conclusion and Recommendations**

982 Gender and protection mainstreaming in humanitarian health response is a complex  
983 phenomenon that involves multiple sectors and actors from all layers. Analysing existing  
984 strategies, tools and guidelines, our study identified 68 recommended interventions under nine  
985 general themes, i.e., partnership and coordination, safety and security, infrastructure, WASH and  
986 patient flow, child protection measures, targeted interventions toward vulnerable groups, GBV  
987 prevention and response and information management. Exploring practices on gender and  
988 protection mainstreaming, we added two more themes: emergency preparedness and response  
989 and COVID-19 response. The study revealed a range of good practices on gender and protection  
990 mainstreaming in health response, e.g. placement of a gender action plan, application of Gender  
991 with Age Marker (GAM), monitoring system for gender and disability inclusion, rationalisation  
992 exercise on location and distribution of health facilities, emergency preparedness and response  
993 system, infection prevention and control system, availability of sex-segregated toilets and waiting  
994 spaces, established GBV referral pathway and availability of GBV service at most PHCs and  
995 engagement of female CHWs from local community. The study also revealed some best practices  
996 that are happening on a small scale but could be scaled up, such as arranging psycho-social  
997 events/spaces at health facilities for children, palliative care for terminally ill patients, integrated  
998 medical and protection services at health facilities, and facilitating community health facility  
999 support groups. We identified some interventions that need further improvement or scale-up,

1000 e.g., the provision of disability-segregated toilets, setting up a comprehensive waste  
1001 management system, provision of sex, age and disability-disaggregated data and a responsive  
1002 community feedback mechanism. We also found critical gaps in some areas, e.g. lack of women’s  
1003 leadership in health response, gaps in terms of coordination, capacity building, strategy planning  
1004 and targeted interventions to address needs and concerns of older age, disability, GDP and other  
1005 vulnerable groups, limited scope of monitoring the quality/functionality of the interventions, lack  
1006 of adherence to infrastructural adaptation measures, inconsistent power supply to the health  
1007 facility, limited effort in consultation with community, especially women and vulnerable groups  
1008 on their concerns and absence of any triage protocols that prioritise socially vulnerable  
1009 individuals.

1010 Based on the research findings, we recommend the following actions to improve gender and  
1011 protection mainstreaming in health response.

- 1012 (1) There should be a comprehensive gender and protection mainstreaming practical guide  
1013 for the partners harmonising all existing resources with details on practical solutions. The  
1014 focus should be given to the inclusion of all vulnerabilities, including gender, age,  
1015 disability and any form of discrimination and stigmatisation. In line with the guideline,  
1016 the Gender Action Plan can be further expanded, covering all vulnerabilities with clear  
1017 actions.
- 1018 (2) Women’s leadership in health response should be promoted and strategised, ensuring  
1019 their representation in all technical, management, and coordination roles at all levels.
- 1020 (3) The Monitoring and evaluation system for gender and protection mainstreaming should  
1021 be further strengthened, incorporating qualitative measures to measure the quality and  
1022 functionality of the interventions.
- 1023 (4) A comprehensive capacity-building plan on gender and protection issues should be  
1024 developed, ensuring the benefit of staff from all levels of agencies and staff.
- 1025 (5) All facilities in inaccessible areas or with unsafe routes should be relocated to safer and  
1026 more accessible locations.
- 1027 (6) Advocacy initiatives should be undertaken to ensure consistent power supply to health  
1028 facilities. Low-cost innovative solutions can be further researched.



- 1029 (7) The effectiveness of infection prevention and control (IPC) protocols should be  
1030 researched, and IPC measures (including PPE) should be gender-inclusive.
- 1031 (8) Infrastructural and WASH guidance should be provided to the health partners and  
1032 relevant engineering teams, including gender, age, and disability, with a proper  
1033 monitoring system in place.
- 1034 (9) Triage protocols should be upgraded to prioritise socially vulnerable individuals.
- 1035 (10) Child protection in health response, including the provision of a child-friendly  
1036 environment and communication, should be further strengthened through better  
1037 collaboration between health and child protection partners. The existing best practices  
1038 of psychosocial support for children should be promoted and scaled up.
- 1039 (11) Targeted interventions towards neglected groups, e.g., persons with disability, older  
1040 persons and GDP, should be undertaken, scaled up and included in the Joint Response  
1041 Plan. There should be established referral pathways for such services.
- 1042 (12) Existing innovations and best practices for integrated GBV prevention and response  
1043 interventions should be promoted, included in the strategy and further scaled up. Health  
1044 posts should be further capacitated on the GBV referral pathways.
- 1045 (13) Engagement with the community and AAP, including all vulnerable groups, should be  
1046 intensified through the implementation and monitoring of the existing AAP plan.
- 1047 (14) Risk communication and community engagement strategies should be responsive to the  
1048 needs of all genders, ages, disabilities, and vulnerable groups, considering local culture,  
1049 context, and language.
- 1050 (15) All surveillance and reporting tools should have measures for collecting gender (not only  
1051 sex), age (all groups), and disability disaggregated data. A system should be in place to  
1052 identify barriers to vulnerable groups.
- 1053 (16) The best practices of COVID-19 response (e.g., an age- and disability-inclusive  
1054 vaccination campaign and child protection in SARI ITCs) can be replicated in other  
1055 outbreak settings, such as dengue and diphtheria.
- 1056 We urge policymakers, sector coordinators, health program managers, and healthcare  
1057 professionals to address the aforementioned gaps and challenges, learn and scale up the best

1058 practices, and apply the recommendations mentioned above. Although the research addressed  
1059 gender and protection mainstreaming at the local level, many of the findings can be generalised  
1060 to other similar humanitarian contexts; consequently, the global health and protection clusters  
1061 and respective sectors in other local contexts can use the research findings to advance the field.  
1062 Moreover, this study paved the way for future quantitative and qualitative research on the  
1063 themes and actions found in this study pertaining to gender and protection mainstreaming in  
1064 humanitarian health responses.

1065

1066

## 1067 **Acknowledgement**

1068 This article is based on a dissertation by the author that was submitted to the University of  
1069 Manchester for the MSc in Global Health at the Humanitarian and Conflict Response Institute in  
1070 the Faculty School of Humanities. The author thanks everyone who provided their generous  
1071 support for the successful completion of this study and acknowledges the contribution of the 12  
1072 health and protection experts in Cox's Bazar who took part in the in-depth interviews and gave  
1073 their valuable time, information and opinions for this research.

1074

## 1075 **References:**

- 1076 1. World Health Organization. Managing WHO Humanitarian Response in the Field: Draft  
1077 [Internet]. 2008 [cited 2022 Aug 30]. Available from:  
1078 [https://www.who.int/hac/techguidance/tools/full\\_manual.pdf](https://www.who.int/hac/techguidance/tools/full_manual.pdf)
- 1079 2. Sphere Project, editor. The sphere handbook: humanitarian charter and minimum standards in  
1080 humanitarian response. Fourth edition. Geneva, Switzerland: Sphere Association; 2018. 406 p.
- 1081 3. Global Protection Cluster. Brief on protection mainstreaming [Internet]. 2022 [cited 2022 May  
1082 24]. Available from: [https://globalprotectioncluster.org/sites/default/files/2022-](https://globalprotectioncluster.org/sites/default/files/2022-05/brief_on_protection_mainstreaming.pdf)  
1083 [05/brief\\_on\\_protection\\_mainstreaming.pdf](https://globalprotectioncluster.org/sites/default/files/2022-05/brief_on_protection_mainstreaming.pdf)
- 1084 4. ActionAid. On the frontline: Catalyzing women's leadership in humanitarian action. [Internet].  
1085 ActionAid; 2016 [cited 2022 Aug 30]. Available from:

- 1086 [https://www.actionaid.org.uk/sites/default/files/publications/actionaid\\_policy\\_report\\_on\\_the\\_frontline\\_catalysing\\_womens\\_leadership\\_in\\_humanitarian\\_action.pdf](https://www.actionaid.org.uk/sites/default/files/publications/actionaid_policy_report_on_the_frontline_catalysing_womens_leadership_in_humanitarian_action.pdf)  
1087
- 1088 5. Aditi Sharma. The influence of patriarchy on women’s health. Scholarsphere [Internet]. 2021  
1089 [cited 2022 Aug 30]; Available from: [https://scholarsphere.psu.edu/resources/af04330a-2df1-460c-a61f-](https://scholarsphere.psu.edu/resources/af04330a-2df1-460c-a61f-91573f688be3)  
1090 [91573f688be3](https://scholarsphere.psu.edu/resources/af04330a-2df1-460c-a61f-91573f688be3)
- 1091 6. Antai D, Namasivayam, Osuorah, Syed. The role of gender inequities in women’s access to  
1092 reproductive health care: a population-level study of Namibia, Kenya, Nepal, and India. *Int J Womens*  
1093 *Health*. 2012 Jul;351.
- 1094 7. Age and Disability Consortium. Humanitarian inclusion standards for older people and people  
1095 with disabilities. [Internet]. Age and Disability Consortium; 2018 [cited 2022 May 6]. Available from:  
1096 [https://reliefweb.int/sites/reliefweb.int/files/resources/Humanitarian\\_inclusion\\_standards\\_for\\_older\\_p](https://reliefweb.int/sites/reliefweb.int/files/resources/Humanitarian_inclusion_standards_for_older_people_and_people_with_disabi....pdf)  
1097 [eople\\_and\\_people\\_with\\_disabi....pdf](https://reliefweb.int/sites/reliefweb.int/files/resources/Humanitarian_inclusion_standards_for_older_people_and_people_with_disabi....pdf)
- 1098 8. Alex Robinson, Manjula Marella, Lana Logam. Gap Analysis: the inclusion of people with  
1099 disability and older people in humanitarian response; Key findings from academic and grey literature  
1100 reviews [Internet]. London: ELHRA; 2020 [cited 2022 Aug 30]. Available from:  
1101 [https://www.elrha.org/wp-content/uploads/2020/07/Elrha-HIF\\_Gap-Analysis\\_Inclusion-of-people-with-](https://www.elrha.org/wp-content/uploads/2020/07/Elrha-HIF_Gap-Analysis_Inclusion-of-people-with-disability-and-older-people_Literature-Review2020-A.pdf)  
1102 [disability-and-older-people\\_Literature-Review2020-A.pdf](https://www.elrha.org/wp-content/uploads/2020/07/Elrha-HIF_Gap-Analysis_Inclusion-of-people-with-disability-and-older-people_Literature-Review2020-A.pdf)
- 1103 9. UNHCR Bangladesh Operational Update April 2022 [Internet]. UNHCR; 2022 Apr. Available from:  
1104 <https://data.unhcr.org/en/documents/details/92906>
- 1105 10. Polonsky JA, Ivey M, Mazhar MdKA, Rahman Z, Le Polain De Waroux O, Karo B, et al.  
1106 Epidemiological, clinical, and public health response characteristics of a large outbreak of diphtheria  
1107 among the Rohingya population in Cox’s Bazar, Bangladesh, 2017 to 2019: A retrospective study. Spiegel  
1108 P, editor. *PLOS Med*. 2021 Apr 1;18(4):e1003587.
- 1109 11. Faruque ASG, Khan AI, Islam SMR, Nahar B, Hossain MN, Widiati Y, et al. Diarrhea treatment  
1110 center (DTC) based diarrheal disease surveillance in settlements in the wake of the mass influx of  
1111 forcibly displaced Myanmar national (FDMN) in Cox’s Bazar, Bangladesh, 2018. Riddle MS, editor. *PLOS*  
1112 *ONE*. 2021 Aug 2;16(8):e0254473.
- 1113 12. Halder CE, Hasan MA, Mohamud YM, Nyawara M, Okello JC, Mizan MN, et al. COVID-19  
1114 preventive measures in Rohingya refugee camps: An assessment of knowledge, attitude and practice.  
1115 Dubik SD, editor. *PLOS ONE*. 2024 Jan 24;19(1):e0282558.
- 1116 13. Health Sector, Cox’s Bazar. Health sector Strategic Plan (2023 – 2024) [Internet]. Cox’s Bazar,  
1117 Bangladesh: Health Sector; 2022. Available from: [https://rohingyaresponse.org/wp-](https://rohingyaresponse.org/wp-content/uploads/2023/04/Health-Sector-Strategic-Plan-2023-2024.pdf)  
1118 [content/uploads/2023/04/Health-Sector-Strategic-Plan-2023-2024.pdf](https://rohingyaresponse.org/wp-content/uploads/2023/04/Health-Sector-Strategic-Plan-2023-2024.pdf)
- 1119 14. OXFAM. Breaking barriers for Rohingya refugee women [Internet]. 2022 [cited 2022 Aug 30].  
1120 Available from: <https://www.oxfam.org/en/breaking-barriers-rohingya-refugee-women>
- 1121 15. REACH. Bangladesh: age and disability inclusion needs assessment - Rohingya refugee response  
1122 [Internet]. REACH; 2021 May [cited 2024 Aug 28]. Available from:

- 1123 repository.org/document/reach/17afa088/REACH\_BGD\_Report\_Age-and-Disability-Inclusion-Needs-  
1124 Assessment\_May-2021.pdf
- 1125 16. Global Protection Cluster. Health – Tips for Protection Mainstreaming [Internet]. 2014 [cited  
1126 2022 May 24]. Available from:  
1127 [https://www.globalprotectioncluster.org/\\_assets/files/aors/protection\\_mainstreaming/Pr  
1128 otection%20Mainstreaming%20Tip%20Sheet%20-%20Health%20Programs.docx](https://www.globalprotectioncluster.org/_assets/files/aors/protection_mainstreaming/PM_training/Protection%20Mainstreaming%20Tip%20Sheet%20-%20Health%20Programs.docx)
- 1129 17. Pakistan Protection Cluster. Checklist for protection mainstreaming in health [Internet]. Pakistan  
1130 Protection Cluster; 2012 [cited 2022 May 4]. Available from:  
1131 [https://www.globalprotectioncluster.org/\\_assets/files/aors/protection\\_mainstreaming/Country  
1132 Examples/Pakistan/PAK\\_Protection\\_Mainstreaming\\_Checklist\\_Health\\_2012\\_EN.pdf](https://www.globalprotectioncluster.org/_assets/files/aors/protection_mainstreaming/Country_Examples/Pakistan/PAK_Protection_Mainstreaming_Checklist_Health_2012_EN.pdf)
- 1133 18. Somalia Protection Cluster. Mainstreaming Protection in health – Somalia operation [Internet].  
1134 Somalia Protection Cluster; 2019 [cited 2022 Aug 26]. Available from:  
1135 [https://reliefweb.int/sites/reliefweb.int/files/resources/pm\\_somalia\\_booklet\\_-\\_health\\_final.pdf](https://reliefweb.int/sites/reliefweb.int/files/resources/pm_somalia_booklet_-_health_final.pdf)
- 1136 19. UNICEF. Enhancing gender in humanitarian response [Internet]. UNICEF; 2018 [cited 2022 May  
1137 4]. Available from: [https://www.unicef.org/rosa/media/2481/file/Enhancing Gender in Humanitarian  
1138 Response.pdf](https://www.unicef.org/rosa/media/2481/file/Enhancing_Gender_in_Humanitarian_Response.pdf)
- 1139 20. Inter-Agency Standing Committee. Guidelines - inclusion of persons with disabilities in  
1140 humanitarian action [Internet]. 2019 [cited 2022 May 6]. Available from:  
1141 [https://interagencystandingcommittee.org/system/files/2020-  
1142 11/IASC%20Guidelines%20on%20the%20Inclusion%20of%20Persons%20with%20Disabilities%20in%20H  
1143 umanitarian%20Action%2C%202019\\_0.pdf](https://interagencystandingcommittee.org/system/files/2020-11/IASC%20Guidelines%20on%20the%20Inclusion%20of%20Persons%20with%20Disabilities%20in%20Humanitarian%20Action%2C%202019_0.pdf)
- 1144 21. Patel P, Meagher K, El Achi N, Ekzayez A, Sullivan R, Bowsher G. “Having more women  
1145 humanitarian leaders will help transform the humanitarian system”: challenges and opportunities for  
1146 women leaders in conflict and humanitarian health. *Confl Health*. 2020 Dec;14(1):84.
- 1147 22. Meagher K, Singh NS, Patel P. The role of gender inclusive leadership during the COVID-19  
1148 pandemic to support vulnerable populations in conflict settings. *BMJ Glob Health*. 2020  
1149 Sep;5(9):e003760.
- 1150 23. Witter S, Namakula J, Wurie H, Chirwa Y, So S, Vong S, et al. The gendered health workforce:  
1151 mixed methods analysis from four fragile and post-conflict contexts. *Health Policy Plan*. 2017 Dec  
1152 1;32(suppl\_5):v52–62.
- 1153 24. Selma Scheewe. Power women - female leaders in the humanitarian sector Jordan: experiences  
1154 of context project participants [Internet]. RedR UK; [cited 2022 Aug 30]. Available from:  
1155 [https://www.redr.org.uk/getmedia/d2d7cd16-5551-493e-a33a-bcc7fada7397/CPW\\_report\\_1.pdf](https://www.redr.org.uk/getmedia/d2d7cd16-5551-493e-a33a-bcc7fada7397/CPW_report_1.pdf)
- 1156 25. Myers A, Sami S, Onyango MA, Karki H, Anggraini R, Krause S. Facilitators and barriers in  
1157 implementing the Minimum Initial Services Package (MISP) for reproductive health in Nepal post-  
1158 earthquake. *Confl Health*. 2018 Dec;12(1):35.

- 1159 26. Beek K, Drysdale R, Kusen M, Dawson A. Preparing for and responding to sexual and  
1160 reproductive health in disaster settings: evidence from Fiji and Tonga. *Reprod Health*. 2021  
1161 Dec;18(1):185.
- 1162 27. Warren E, Post N, Hossain M, Blanchet K, Roberts B. Systematic review of the evidence on the  
1163 effectiveness of sexual and reproductive health interventions in humanitarian crises. *BMJ Open*. 2015  
1164 Dec;5(12):e008226.
- 1165 28. Desrosiers A, Betancourt T, Kergoat Y, Servilli C, Say L, Kobeissi L. A systematic review of sexual  
1166 and reproductive health interventions for young people in humanitarian and lower-and-middle-income  
1167 country settings. *BMC Public Health*. 2020 Dec;20(1):666.
- 1168 29. Casey SE, Chynoweth SK, Cornier N, Gallagher MC, Wheeler EE. Progress and gaps in  
1169 reproductive health services in three humanitarian settings: mixed-methods case studies. *Confl Health*.  
1170 2015 Dec;9(S1):S3.
- 1171 30. Guttmacher Institute, Sully EA, Biddlecom A, Darroch JE, Riley T, Ashford LS, et al. Adding It Up:  
1172 Investing in Sexual and Reproductive Health 2019 [Internet]. Guttmacher Institute; 2020 Jul [cited 2024  
1173 Jul 26]. Available from: [https://www.guttmacher.org/report/adding-it-up-investing-in-sexual-](https://www.guttmacher.org/report/adding-it-up-investing-in-sexual-reproductive-health-2019)  
1174 [reproductive-health-2019](https://www.guttmacher.org/report/adding-it-up-investing-in-sexual-reproductive-health-2019)
- 1175 31. P. Wesley, Manjula Marella, Alex Robinson. Gap Analysis: the inclusion of people with disability  
1176 and older people in humanitarian response; Part 2: Beyond the evidence: Implications for innovation  
1177 and practice [Internet]. London: ELHRA; 2020 [cited 2022 Aug 20]. Available from:  
1178 [https://www.elrha.org/wp-content/uploads/2020/10/Nossal-Elrha\\_Report\\_Part\\_2-accessible.pdf](https://www.elrha.org/wp-content/uploads/2020/10/Nossal-Elrha_Report_Part_2-accessible.pdf)
- 1179 32. Baškarada S. Qualitative Case Study Guidelines [Internet]. Commonwealth of Australia; 2013  
1180 [cited 2022 Aug 30]. Available from: <https://apps.dtic.mil/sti/pdfs/ADA594462.pdf>
- 1181 33. Rohingya refugee response. About the Rohingya Refugee Response [Internet]. Available from:  
1182 <https://rohingyaresponse.org/about-us/>
- 1183 34. ISCG. Joint Response Plan 2022: Rohingya Humanitarian Crisis. [Internet]. 2022. Available from:  
1184 [https://reliefweb.int/report/bangladesh/2022-joint-response-plan-rohingya-humanitarian-crisis-](https://reliefweb.int/report/bangladesh/2022-joint-response-plan-rohingya-humanitarian-crisis-january-december-2022)  
1185 [january-december-2022](https://reliefweb.int/report/bangladesh/2022-joint-response-plan-rohingya-humanitarian-crisis-january-december-2022)
- 1186 35. Family health international. Module 1: Qualitative Research Methods Overview. In: *Qualitative*  
1187 *Research Methods: A Data Collector's Field Guide* [Internet]. Family health international; Available from:  
1188 <https://course.ccs.neu.edu/is4800sp12/resources/qualmethods.pdf>
- 1189 36. Kiger ME, Varpio L. Thematic analysis of qualitative data: AMEE Guide No. 131. *Med Teach*. 2020  
1190 Aug 2;42(8):846–54.
- 1191 37. Braun V, Clarke V. Using thematic analysis in psychology. *Qual Res Psychol*. 2006 Jan;3(2):77–  
1192 101.
- 1193 38. Health Sector, Cox's Bazar. Health Sector Gender Action Plan 2021. 2021.
- 1194 39. Protection Sector, Cox's Bazar. Health Sector Programs - Tips for Protection Mainstreaming  
1195 [Internet]. 2022 [cited 2022 Aug 3]. Available from: <https://reliefweb.int/attachments/43d86f01-647a->

- 1196 34c0-ae0f-06d3920b1bf7/protection\_mainstreaming\_tip\_sheet\_-\_health\_programs\_-  
1197 \_revision\_2022.pdf
- 1198 40. Health Sector, Cox's Bazar. Accountability to Affected Populations (AAP) Framework [Internet].  
1199 2021. Available from: [https://rohingyaresponse.org/wp-content/uploads/2023/04/Accountability-to-](https://rohingyaresponse.org/wp-content/uploads/2023/04/Accountability-to-Affected-Populations-AAP-Framework-August-2021.pdf)  
1200 [Affected-Populations-AAP-Framework-August-2021.pdf](https://rohingyaresponse.org/wp-content/uploads/2023/04/Accountability-to-Affected-Populations-AAP-Framework-August-2021.pdf)
- 1201 41. Health Sector, Cox's Bazar. Child Protection & Health Care for Children in Health Facilities during  
1202 COVID-19 Cox's Bazar [Internet]. 2020. Available from: [https://reliefweb.int/attachments/6ece8ada-](https://reliefweb.int/attachments/6ece8ada-203d-388b-bae8-43b4c96cf81f/protection_care_for_children_in_health_facilities_fnl.pdf)  
1203 [203d-388b-bae8-43b4c96cf81f/protection\\_care\\_for\\_children\\_in\\_health\\_facilities\\_fnl.pdf](https://reliefweb.int/attachments/6ece8ada-203d-388b-bae8-43b4c96cf81f/protection_care_for_children_in_health_facilities_fnl.pdf)
- 1204 42. Inter-Agency Standing Committee. Gender with Age Marker (GAM) [Internet]. 2021 [cited 2022  
1205 Aug 28]. Available from: <https://www.iascgenderwithagemarker.com/en/home/>
- 1206 43. Gender in Humanitarian Action Working Group. Gender in Humanitarian Action [Internet]. [cited  
1207 2022 Aug 28]. Available from: [https://rohingyaresponse.org/cross-cutting/gender-in-humanitarian-](https://rohingyaresponse.org/cross-cutting/gender-in-humanitarian-action/)  
1208 [action/](https://rohingyaresponse.org/cross-cutting/gender-in-humanitarian-action/)
- 1209 44. Health Sector, Cox's Bazar. Health sector quarterly monitoring report (Jan – Mar 2022)  
1210 [Internet]. 2022 [cited 2022 Aug 30]. Available from: Health Sector Quarterly Bulletin (April – June 2022).
- 1211 45. Health Sector, Cox's Bazar. Health Sector Quarterly Bulletin (April – June 2022) [Internet]. Cox's  
1212 Bazar: Health Sector; [cited 2022 Aug 30]. Available from: [https://reliefweb.int/attachments/72c694d9-](https://reliefweb.int/attachments/72c694d9-8990-41f8-8912-ca640b1d4c43/april-june_2022_health_sector_bulletin.pdf)  
1213 [8990-41f8-8912-ca640b1d4c43/april-june\\_2022\\_health\\_sector\\_bulletin.pdf](https://reliefweb.int/attachments/72c694d9-8990-41f8-8912-ca640b1d4c43/april-june_2022_health_sector_bulletin.pdf)
- 1214 46. World Health Organization. Water and sanitation for health facility improvement tool (WASH  
1215 FIT): a practical guide for improving quality of care through water, sanitation and hygiene in health care  
1216 facilities [Internet]. Geneva: World Health Organization; 2017 [cited 2024 Jul 26]. 104 p. Available from:  
1217 <https://iris.who.int/handle/10665/254910>
- 1218 47. Khan HTA, Rahman MA, Molla MH, Shahjahan M, Abdullah RB. Humanitarian Emergencies of  
1219 Rohingya Older People in Bangladesh: A Qualitative Study on Hopes and Reality. Ageing Int. 2022  
1220 Mar;47(1):20–37.
- 1221 48. Help Age. Myanmar crisis [Internet]. [cited 2022 Aug 28]. Available from:  
1222 <https://www.helpage.org/what-we-do/emergencies/humanitarian-response/rohingya-crisis/>
- 1223 49. Protection Working Group Cox's Bazar, Bangladesh: Referral Pathway for different services (as  
1224 of November 2022) [Internet]. [cited 2022 Aug 2]. Available from:  
1225 [https://reliefweb.int/report/bangladesh/protection-working-group-coxs-bazar-bangladesh-referral-](https://reliefweb.int/report/bangladesh/protection-working-group-coxs-bazar-bangladesh-referral-pathway-different-services-november-2022)  
1226 [pathway-different-services-november-2022](https://reliefweb.int/report/bangladesh/protection-working-group-coxs-bazar-bangladesh-referral-pathway-different-services-november-2022)
- 1227 50. Health Sector, Cox's Bazar. Minimum Package of Essential Health Services for Primary healthcare  
1228 facilities in the FDMN camps, Cox Bazar [Internet]. Cox's Bazar; 2020 [cited 2022 Aug 1]. Available from:  
1229 [https://rohingyaresponse.org/wp-content/uploads/2023/04/Minimum-Package-of-Essential-Health-](https://rohingyaresponse.org/wp-content/uploads/2023/04/Minimum-Package-of-Essential-Health-Services-for-Primary-Healthcare-Facilities-in-FDMNRefugee-Camps.pdf)  
1230 [Services-for-Primary-Healthcare-Facilities-in-FDMNRefugee-Camps.pdf](https://rohingyaresponse.org/wp-content/uploads/2023/04/Minimum-Package-of-Essential-Health-Services-for-Primary-Healthcare-Facilities-in-FDMNRefugee-Camps.pdf)
- 1231 51. Health Sector, Cox's Bazar. Health sector cyclone and monsoon contingency plan. Cox's Bazar.  
1232 2021.

- 1233 52. Health Sector, Cox's Bazar. Mobile Medical Team Operational Plan, Cox's Bazar. Cox's Bazar:  
1234 Mobile Medical Team Technical Working Group; 2020.
- 1235 53. European Institute for Gender Equality. Gender Equality in Academia and Research [Internet].  
1236 2022. Available from: [https://eige.europa.eu/gender-mainstreaming/toolkits/gear/step-step-](https://eige.europa.eu/gender-mainstreaming/toolkits/gear/step-step-guide/step-5)  
1237 [guide/step-5](https://eige.europa.eu/gender-mainstreaming/toolkits/gear/step-step-guide/step-5)
- 1238 54. IOM. Solar Power Brings 24-Hour Healthcare to Rohingya Refugees, Local Communities in  
1239 Bangladesh [Internet]. Cox's Bazar: IOM; 2017 [cited 2022 Aug 28]. Available from:  
1240 [https://www.iom.int/news/solar-power-brings-24-hour-healthcare-rohingya-refugees-local-](https://www.iom.int/news/solar-power-brings-24-hour-healthcare-rohingya-refugees-local-communities-bangladesh)  
1241 [communities-bangladesh](https://www.iom.int/news/solar-power-brings-24-hour-healthcare-rohingya-refugees-local-communities-bangladesh)
- 1242 55. Reliefweb. Going Solar in Cox's Bazar: Ensuring a Sustainable Future for Refugees and Host  
1243 Communities [Internet]. Reliefweb; 2021 [cited 2022 Aug 28]. Available from:  
1244 [https://reliefweb.int/report/bangladesh/going-solar-cox-s-bazar-ensuring-sustainable-future-refugees-](https://reliefweb.int/report/bangladesh/going-solar-cox-s-bazar-ensuring-sustainable-future-refugees-and-host-communities)  
1245 [and-host-communities](https://reliefweb.int/report/bangladesh/going-solar-cox-s-bazar-ensuring-sustainable-future-refugees-and-host-communities)
- 1246 56. Barrera-Cancedda AE, Riman KA, Shinnick JE, Bittenheim AM. Implementation strategies for  
1247 infection prevention and control promotion for nurses in Sub-Saharan Africa: a systematic review.  
1248 *Implement Sci*. 2019 Dec;14(1):111.
- 1249 57. Sharma U, Kalra S, Gupta S, Seth N, Mawari G, Kumar N, et al. The crisis of biomedical wastes  
1250 associated with the COVID-19 pandemic and management using sustainable technologies for sound  
1251 management of healthcare waste associated with pandemics. *Int J Community Med Public Health*. 2022  
1252 Jan 28;9(2):1084.
- 1253 58. Chaudhary N, Mahato SK, Chaudhary S, Bhatiya BD. Biomedical Waste Management in Nepal: a  
1254 Review. *J Univers Coll Med Sci*. 2015 Feb 7;2(4):45–52.
- 1255 59. UNICEF. Protecting children in humanitarian action [Internet]. UNICEF; [cited 2022 Aug 29].  
1256 Available from: <https://www.unicef.org/protection/protecting-children-in-humanitarian-action#how>
- 1257 60. Hossain MM, Sultana A, Das A. Gender-based violence among Rohingya refugees in Bangladesh:  
1258 a public health challenge. *Indian J Med Ethics* [Internet]. 2018 Jun 6 [cited 2024 Jul 25]; Available from:  
1259 [http://ijme.in/articles/gender-based-violence-among-rohingya-refugees-in-bangladesh-a-public-health-](http://ijme.in/articles/gender-based-violence-among-rohingya-refugees-in-bangladesh-a-public-health-challenge/?galley=html)  
1260 [challenge/?galley=html](http://ijme.in/articles/gender-based-violence-among-rohingya-refugees-in-bangladesh-a-public-health-challenge/?galley=html)
- 1261 61. Henttonen M, Watts C, Roberts B, Kaducu F, Borchert M. Health Services for Survivors of  
1262 Gender-Based Violence in Northern Uganda: A Qualitative Study. *Reprod Health Matters*. 2008  
1263 Jan;16(31):122–31.
- 1264 62. Liebling H, Barrett H, Artz L. South Sudanese Refugee Survivors of Sexual and Gender-Based  
1265 Violence and Torture: Health and Justice Service Responses in Northern Uganda. *Int J Environ Res Public*  
1266 *Health*. 2020 Mar 5;17(5):1685.
- 1267 63. Halder CE, Hasan MA, Mohamud YM, Nyawara M, Okello JC, Mizan MN, et al. Understanding the  
1268 challenges and gaps in community engagement interventions for COVID-19 prevention strategies in  
1269 Rohingya refugees: a qualitative study with frontline workers and community representatives. *Front*  
1270 *Public Health*. 2023 Aug 3;11:1169050.

- 1271 64. Singh NS, Smith J, Aryasinghe S, Khosla R, Say L, Blanchet K. Evaluating the effectiveness of  
1272 sexual and reproductive health services during humanitarian crises: A systematic review. Keygnaert I,  
1273 editor. PLOS ONE. 2018 Jul 6;13(7):e0199300.
- 1274 65. World Health Organization. Community engagement: a health promotion guide for universal  
1275 health coverage in the hands of the people. World Health Organization [Internet]. Geneva, Switzerland;  
1276 2020. Available from: <https://apps.who.int/iris/handle/10665/334379>
- 1277 66. IOM. DTM MSLA for Disability Inclusion [Internet]. [cited 2022 Aug 28]. Available from:  
1278 <https://displacement.iom.int/dtm-partners-toolkit/guide/dtm-msla-disability-inclusion>
- 1279 67. UNICEF. Child Functioning [Internet]. 2021 [cited 2022 Aug 30]. Available from:  
1280 <https://data.unicef.org/topic/child-disability/data-collection-tools/module-on-child-functioning/>
- 1281 68. World Health Organization, International Organization for Migration. After Action Review (AAR)  
1282 Report: Response to the Fire Incident by the Mobile Medical Teams in Rohingya Refugee Camps  
1283 [Internet]. Cox's Bazar; 2021 [cited 2022 Sep 30]. Available from:  
1284 [https://reliefweb.int/attachments/046ff6dd-9058-32fe-8c74-  
1285 0204e2eeb5fd/after\\_action\\_review\\_aar\\_report\\_of\\_mmt\\_response\\_to\\_the\\_fire\\_incident\\_in\\_march\\_20  
1286 21-2.pdf](https://reliefweb.int/attachments/046ff6dd-9058-32fe-8c74-0204e2eeb5fd/after_action_review_aar_report_of_mmt_response_to_the_fire_incident_in_march_2021-2.pdf)
- 1287 69. Root RL. PPE is designed for men. Some health experts are hoping to change that. Devex  
1288 [Internet]. 2021 Jul 26 [cited 2022 Aug 30]; Available from: [https://www.devex.com/news/ppe-is-  
1289 designed-for-men-some-health-experts-are-hoping-to-change-that-100388](https://www.devex.com/news/ppe-is-designed-for-men-some-health-experts-are-hoping-to-change-that-100388)
- 1290 70. Bessonov A. Do religious face coverings count as masks? Your COVID-19 questions answered.  
1291 CBC News [Internet]. 2020 Jul 22 [cited 2022 May 6]; Available from:  
1292 <https://www.cbc.ca/news/health/religious-face-coverings-covid-questions-answered-1.5657670>

1293

## 1294 **Supporting information**

1295 **S1. Interview Guidance.** Guidance Questionnaire for Interview
